# Supplementary material for: Contextual characteristics associated with the perceived neighbourhood scale in a cross-sectional study in a large urban centre in Brazil
Source: PubMed Central journal article supplement — BMJ Open. 2018 Aug 20;8(8):e021445. doi: 10.1136/bmjopen-2017-021445 (PMC6104762; doi:10.1136/bmjopen-2017-021445), 2018-08-20
Supplement: bmjopen-2017-021445.draft_revisions.pdf [file bmjopen-2017-021445.draft_revisions.pdf]

# BMJ Open

BMJ Open is committed to open peer review. As part of this commitment we make the peer review history of every article we publish publicly available.

When an article is published we post the peer reviewers' comments and the authors' responses online. We also post the versions of the paper that were used during peer review. These are the versions that the peer review comments apply to.

The versions of the paper that follow are the versions that were submitted during the peer review process. They are not the versions of record or the final published versions. They should not be cited or distributed as the published version of this manuscript.

BMJ Open is an open access journal and the full, final, typeset and author-corrected version of record of the manuscript is available on our site with no access controls, subscription charges or pay-per-view fees (<http://bmjopen.bmj.com>).

If you have any questions on BMJ Open's open peer review process please email [info.bmjopen@bmj.com](mailto:info.bmjopen@bmj.com)

# BMJ Open

## Contextual characteristics associated with the perceived neighborhood scale in a large urban center in Brazil

|                               |                                                                                                                                                                                                                                                                                                                                                                                                                                                                                                                                                                                                                                                                                                                                                                  |
|-------------------------------|------------------------------------------------------------------------------------------------------------------------------------------------------------------------------------------------------------------------------------------------------------------------------------------------------------------------------------------------------------------------------------------------------------------------------------------------------------------------------------------------------------------------------------------------------------------------------------------------------------------------------------------------------------------------------------------------------------------------------------------------------------------|
| Journal:                      | <i>BMJ Open</i>                                                                                                                                                                                                                                                                                                                                                                                                                                                                                                                                                                                                                                                                                                                                                  |
| Manuscript ID                 | bmjopen-2017-021445                                                                                                                                                                                                                                                                                                                                                                                                                                                                                                                                                                                                                                                                                                                                              |
| Article Type:                 | Research                                                                                                                                                                                                                                                                                                                                                                                                                                                                                                                                                                                                                                                                                                                                                         |
| Date Submitted by the Author: | 05-Jan-2018                                                                                                                                                                                                                                                                                                                                                                                                                                                                                                                                                                                                                                                                                                                                                      |
| Complete List of Authors:     | de Almeida Celio, Fabiano; Universidade Federal de Minas Gerais, Public health<br>Friche, Amélia Augusta ; Universidade Federal de Minas Gerais Faculdade de Medicina, Public health<br>Jennings, M. Zane; Case Western Reserve University Jack Joseph and Morton Mandel School of Applied Social Sciences<br>Andrade, Amanda Cristina; Universidade Federal de Minas Gerais Faculdade de Medicina, public health<br>Xavier, Cesar ; faculdade de saúde e ecologia humana<br>Proietti, Fernando; Faculdade de Saúde e Ecologia Humana; Centro de Pesquisas Rene Rachou<br>Coulton, Claudia J.; Case Western Reserve University Jack Joseph and Morton Mandel School of Applied Social Sciences<br>Caiaffa, Waleska; Federal University of Minas Gerais, Medicine |
| Keywords:                     | neighborhood, urban health, Perceived Neighborhood, neighborhood scale, Community perceptions                                                                                                                                                                                                                                                                                                                                                                                                                                                                                                                                                                                                                                                                    |
|                               |                                                                                                                                                                                                                                                                                                                                                                                                                                                                                                                                                                                                                                                                                                                                                                  |

SCHOLARONE™  
Manuscripts

only

1  
2  
3 **Contextual characteristics associated with the perceived neighborhood scale in a large**  
4 **urban center in Brazil**

5  
6 **Corresponding author: Fabiano de Almeida Célio, [maitiz@gmail.com](mailto:maitiz@gmail.com), +55 31 99877 7761**  
7

8  
9 1) **Fabiano de Almeida Célio**<sup>1</sup>, [maitiz@gmail.com](mailto:maitiz@gmail.com); 2) **Amélia Augusta de Lima Friche**<sup>1</sup>,  
10 [gutafriche@gmail.com](mailto:gutafriche@gmail.com); 3) **M. Zane Jennings**<sup>2</sup>, [mzj@case.edu](mailto:mzj@case.edu); 4) **Amanda Cristina de**  
11 **Souza Andrade**<sup>1</sup>, [amandasouza\\_est@yahoo.com.br](mailto:amandasouza_est@yahoo.com.br); 5) **Cesar Coelho Xavier**<sup>3</sup>,  
12 [cesarxavier@gmail.com](mailto:cesarxavier@gmail.com); 6) **Fernando Augusto Proietti**<sup>3</sup>, [fernandoaproietti@gmail.com](mailto:fernandoaproietti@gmail.com); 7)  
13 **Claudia J. Coulton**<sup>2</sup>, [claudia.coulton@case.edu](mailto:claudia.coulton@case.edu); 8) **Waleska Teixeira Caiaffa**<sup>1</sup>,  
14 [caiaffa.waleska@gmail.com](mailto:caiaffa.waleska@gmail.com)  
15

16  
17 1. Belo Horizonte Observatory for Urban Health, School of Medicine, Federal University of  
18 Minas Gerais, Belo Horizonte, Minas Gerais, Brazil,

19 2. Case Western Reserve University Jack Joseph and Morton Mandel School of Applied  
20 Social Sciences, Cleveland OH, USA

21 3. Faculdade de Saúde e Ecologia Humana, Vespasiano, Minas Gerais, Brazil

22 4. Centro de Pesquisas Rene Rachou, Belo Horizonte, Minas Gerais, Brazil  
23

24 **Keywords:** neighborhood, urban health; Perceived Neighborhood; neighborhood scale,  
25 Community perceptions  
26

27 **Word count:** 3628  
28

29 **Reference count:** 48  
30

31 **Abstract**  
32

33  
34 **Introduction:** Health outcomes have been associated with the physical and social  
35 characteristics of the neighborhood, but still there is no enough information about the  
36 contextual factors related with perceived neighborhood scale. **Objective:** To identify the  
37 contextual factors associated with the self-perceived neighborhood scale. **Methods:** We  
38 analyzed data from a multistage household survey conducted in Belo Horizonte, Brazil, 2008-  
39 2009. The dependent variable was perceived neighborhood encoded as an ordinal scale based  
40 upon a brief description of the concept of the neighborhood and two independent scales  
41 relating distance, expressed in geographical and time approach. Street connectivity,  
42 demographic density and residents' perceptions of the neighborhoods' physical and social  
43 environment were used as contextual predictors. Individual variables were used for  
44 adjustments. Multilevel ordinal logistic regression models estimated the association between  
45 perceived neighborhood scale and contextual characteristics. **Results:** Better perception of  
46 walking environment (OR=2.96; CI 95%: 1.29 – 3.82) and violence (OR=1.35; CI95%: 1.12 –  
47 1.62) was associated with perceptions of larger neighborhood, even adjust by individual's  
48  
49  
50  
51  
52  
53  
54  
55  
56  
57  
58  
59

1  
2  
3 characteristics. **Conclusion:** There are contextual factors associated with self-perceived  
4 neighborhood scale. Careful definition of neighborhood scale is a key factor in improving the  
5 results of eco-epidemiological studies. Although these findings must be further explored in  
6 other studies, these results can contribute for the debate of a better understanding of an  
7 appropriate choice of neighborhood scale, especially for cities in Latin America.  
8  
9

### 10 11 **Strengths and limitations of this study**

- 12 • Large sample of an urban center in Latin America
  - 13 • Analysis includes individual and contextual factors
  - 14 • Neighborhood definition that can be obtained by closed question
  - 15 • Analysis was able to identify the context factors associated with the perceived
  - 16 neighborhood scale
  - 17 • Analysis takes into account physical and social factors of the neighborhood
- 18  
19  
20  
21  
22  
23  
24  
25  
26  
27  
28  
29  
30  
31  
32  
33  
34  
35  
36  
37  
38  
39  
40  
41  
42  
43  
44  
45  
46  
47  
48  
49  
50  
51  
52  
53  
54  
55  
56  
57  
58  
59  
60

## Introduction

Eco-epidemiological research has increasingly used the concept of neighborhood as the geographical area within which physical and social environmental features affect individuals' health outcomes, as part of an emphasis on a more holistic understanding of the factors and processes shaping health outcomes within urban areas [1].

Features in the neighborhood help explain inequalities in health; can be used in studies aiming to evaluate community interventions that intended to improve health outcomes [2-4] and, have been shown to be predictive of health outcomes and health-affecting behaviors such as cardiovascular diseases [5], sexually transmitted diseases [2], mental illness [6], physical activity [7 8], among others [9-12].

However, neighborhood is a complex concept and its definitions in epidemiological studies vary widely [13], with different methodological approaches [14]. Chaix et al (2009) describe two approaches that have been used to define neighborhood in epidemiological research: *the territorial neighborhood and the ego-centered neighborhood approaches*.

*Territorial neighborhoods*, drawn from ecological and social perspectives, are made up of the complex social, economic, and historical relationships between their residents, local geography, and the larger urban structure around them, and have an emergent identity apart from the perceptions of individuals living within them. Researchers using this approach often select administratively-defined, mutually exclusive geographic units such as census units or municipal boundaries as a proxy for neighborhood [13 15]. Assuming resident homogeneity [16 17], this approach is adopted because secondary data is often easily available and spatial references are obtainable, which facilitates reproducibility and comparability across studies or over time. However, territorial neighborhoods consider same areas for different individuals and due to this, individual differences in neighborhood experience and exposure cannot be captured under this approach [18 19]. When the same area is attributed to several individuals in a given region, the potential for error is introduced because individuals are not exposed in a homogeneous way to the physical and social environment of the territory.

The second approach is called *ego-centered neighborhoods* and is drawn upon the idea that the contextual factors affecting individuals will differ depending on the actual location and particular geographic circumstances of those individuals. Several techniques can be used to define this approach. Most importantly, the ego-centered neighborhood results in neighborhoods that may overlap, are not mutually exclusive, and which are specific to the

1  
2  
3 household or individual resident [13]. This approach can be operationalized in three different  
4 ways. One uses a buffer, generally a circular area centered upon the individual's residence,  
5 resulting in neighborhoods of the same size, typically, though made up of different areas,  
6 which may overlap one another but are not identical. The second approach involves using  
7 individual behavioral activity spaces measured by GPS. This captures each individual's  
8 movements and activities, creating a unique measure of contextual exposure [9 20]. The third  
9 one uses individually perceived neighborhoods.  
10  
11  
12  
13

14 Perceived neighborhoods, in turn, can be identify by different strategies. Residents may be  
15 asked to identify or draw their neighborhood on a map [21-24] or alternatively, researchers  
16 may ask residents how large they consider their neighborhood to be or how long it takes to  
17 walk from the resident's house to the end of their neighborhood [13 25-27]. This last  
18 technique has the advantage of being easily understood by residents and quickly and  
19 inexpensively done by researchers.  
20  
21  
22  
23  
24

25 Despite the methods, neighborhood scale needs to be carefully set. When it is not correctly  
26 operationalized and defined, the measures derived can be considered problematic and  
27 questionable. Consequently, the understanding of health impacts through the lens of the  
28 neighborhood can be impoverished [28]. One problem that may arise is known in geography  
29 as the [29] "modifiable area unit problem". By aggregating epidemiological data in differently  
30 sized territorial units, different exposure measures can be found and consequently different  
31 results can be obtained between studies, making it difficult or even impossible to compare  
32 findings. Generally, the error of choice of territorial unit of analysis is non-differential, which  
33 may underestimate association measures or even not find associations when they do exist  
34 [30].  
35  
36  
37  
38  
39  
40  
41

42 The attributes that make the neighborhood of an individual a singular place are commonly  
43 described as: a) social interaction; b) social norms and collective effectiveness; c) institutional  
44 resources (schools, health facilities and others) and d) routine activities within the  
45 neighborhood. As we can see, it is difficult not to incur some kind of neighborhood boundary  
46 definition error when the internal dynamics of the place under study are unknown [31].  
47  
48  
49  
50

51 Perceived neighborhood scale has been found to be related to individual characteristics such  
52 as socioeconomic position, employment, evaluation of the aesthetic aspects, the number of  
53 relatives living in the same neighborhood and familiarity with many people in the  
54 neighborhood [27]. However, the scale of perceived neighborhood can be influenced by  
55  
56  
57  
58  
59  
60

1  
2  
3 contextual factors as population density, land use patterns, and collective efficacy [21]. The  
4 connectivity of the streets that directly influence the number of routes available to the various  
5 points of interest within a neighborhood can also influence the perception of its size, because  
6 connectivity may change the way residents use and circulate in physical space [32].  
7  
8

9  
10 This work, by investigating perceived neighborhood scale, addresses an important  
11 methodological question, which concerns the appropriate scale of territorial units of analysis,  
12 reducing possible errors inherent to the process of investigating neighborhood impact on  
13 health outcomes. Despite research results indicating a relationship between neighborhood and  
14 health, it is still rare to find studies that measure the influence of contextual factors as shaped  
15 by perceived neighborhood scale. In Latin America, we have not found any studies with this  
16 same purpose. Therefore, the objective of this study is to analyze the context attributes  
17 associated with the perceived neighborhood scale in a large urban center in Brazil.  
18  
19  
20  
21  
22

## 23 **Methods**

### 24 **Data and Sample**

25  
26 The data for this study come from a cross-sectional population-based study called *BH Health*  
27 *Study*, conducted by the Belo Horizonte Observatory for Urban Health (OSUBH), nested at  
28 the Federal University of Minas Gerais (UFMG), in 2008-9. The participants of the study  
29 were residents belonging to two of the nine sanitary districts of the Belo Horizonte City:  
30 Barreiro and West. These districts were selected because they presented heterogeneity within  
31 the city in relation to social, socio-demographic and health indicators [33-35].  
32  
33  
34  
35  
36  
37

38 A stratified sample was selected by a three-stage process. To ensure the presence of residents  
39 in all socio-economic levels, the study area was divided according to the health vulnerability  
40 index [36], a geocoded index created by combining social, demographic, economic, and  
41 health indicators from different sources for each census tract. At the end of first and second  
42 steps of sampling process, 149 census tracts and 4,048 households were selected. In the third  
43 stage, a resident over 18 years old was randomly selected in each of the identified households  
44 [37].  
45  
46  
47  
48  
49

### 50 **Contextual predictors**

51  
52 The dependent variable for this study is the perceived neighborhood scale that was encoded as  
53 an ordinal variable originally with 7 options. To obtain the scale the interviewer read a brief  
54 description of the concept of the neighborhood: "neighborhood is the place where you live  
55  
56  
57  
58  
59  
60

1  
2  
3 and perform routine tasks such as going to the bakery, grocery store, local businesses, visit  
4 your neighbors and walk. Neighborhood can be understood as the area where you recognize  
5 most of the people". Then the interviewee was asked: "Thinking of your neighborhood, would  
6 you describe it as including: (1) The next-door houses; (2) The block or street you live on; (3)  
7 within 5 blocks; (4) within ten blocks; (5) more than ten blocks away, but less than your  
8 neighborhood; (6) your neighborhood; (7) your neighborhood and neighborhood nearby.  
9 Subsequently, this variable was recoded, using as reference an additional measure of  
10 neighborhood scale. This was a continuous variable obtained from the following question:  
11 "How much time in minutes would you spend walking from the door of your house to the end  
12 of what you consider your neighborhood?". The mean of walking time obtained for each of  
13 the seven options of the first ordinal question variable was used to collapse the final  
14 dependent variable into four options. This procedure was adopted by considering the non-  
15 overlapping of the 95% confidence intervals (95% CI) between each stratum. Thus, the  
16 outcome variable named Perceived neighborhood scale was recoded into four categories: (1)  
17 up to the block or street you live on; (2) within 5 blocks; (3) within ten blocks; and (4) more  
18 than ten blocks away.  
19  
20  
21  
22  
23  
24  
25  
26  
27  
28

### 29 **Independent variables**

30  
31 The independent variables were chosen based on the theoretical (Figure 1) model using other  
32 studies [4 27]. The variables relating to the physical and social environment of the  
33 neighborhood were obtained from scales created by Friche et al [38]. Aggregated for each  
34 census tract the scales provide a continuous score ranging from 1 to 4. In this study, we used  
35 the following scales: aesthetic quality, walking environment, and violence.  
36  
37  
38  
39

40 The aesthetic quality scale was obtained by asking the participants the following about their  
41 neighborhood: 1) Has trash a litter on the streets and sidewalks? 2) Is pleasant for children? 3)  
42 Is pleasant for young children and adolescents? 4) Has trees that make the environment  
43 pleasant?  
44  
45  
46

47 The walking environment scale was obtained by asking the participants the following about  
48 their neighborhood: 1) How you evaluate the public places for sports and leisure? 2) How you  
49 evaluate the traffic? 3) Are there stores at a distance you can walk? 4) Is it easy to walk? 5)  
50 How often do you see other people walking? 6. How often do you see other people  
51 exercising? 7) Do you feel safe walking during the day?  
52  
53  
54  
55

56 The violence scale was comprised by the following questions: During the past 12 months, did  
57  
58  
59  
60



1  
2  
3 you see or heard about: 1) People being mugged in the neighborhood streets; 2) People  
4 fighting using weapon; 3) People being killed by guns; 4) People being victims of sexual  
5 violence; 5) Women of the neighborhood being beaten by their husband and/or partners or  
6 relatives; 6) Children or adolescents of the neighborhood assaulted or victims of violence by  
7 their parents.  
8  
9

10  
11 This study also used contextual variables from census tract and collected by the city hall to  
12 administrative purpose. Street connectivity drawn from all street segments of the area of the  
13 study was obtained using Dephmapx software. This software handles the street segment as if  
14 it were an axial line, and quantifies the segments that intersect each of this lines [32]. The  
15 software delivers a score between 0 a 9, where 0 represents streets with low connectivity and  
16 9 represents high connected streets[39]. The final variable was skewed, with low prevalence  
17 of extreme values, so it was recoded into three categories: low connectivity (0 to 3); medium  
18 connectivity (4) and, high connectivity (5 to 9).  
19  
20  
21  
22  
23

24  
25 Population density was calculated for each census tract using data from the 2010 National  
26 Census [40].  
27  
28

### 29 **Individual variables**

30  
31 Individual variables were included for adjustments due to being found as predictors of  
32 neighborhood scale in previous studies [21 27]. They were: gender, age (in years),  
33 employment status, length of residence in home (in years), presence of children under 10  
34 years of age in household, number of relatives in the same neighborhood (none to all),  
35 number of people who pass in front of participant's house that are known to them (none to  
36 all), and a composite indicator, named national economic index (NEI), which depicts the  
37 current socioeconomic position of the individual, [41], based upon consumer goods instead of  
38 income.  
39  
40  
41  
42  
43  
44

### 45 **Statistical analyses**

46  
47 A descriptive analysis was carried out followed by analysis of association between size of the  
48 neighborhood scale and contextual features estimated by a multilevel ordinal logistic  
49 regression model. The first level consisted of the individual-level and the second consisted of  
50 the neighborhood-level variables.  
51  
52

53  
54 A fixed effects model with random interceptors with a logit function was used to estimate the  
55 odds ratio (OR) and the confidence interval (CI 95%) [42]. The median values of the odds  
56  
57  
58  
59

ratio (MOR) and the percentage of variance reduction were calculated. The Akaike Information Criterion (AIC) was used to compare models, selecting the best model as the one with lowest AIC [43].

First, a null model (only the random intercept) was estimated to assess the contextual effect and then a univariate analysis was performed with a multilevel ordinal logistic regression for each of the contextual variables. Second, those independent variables with a coefficient that was significant at  $p \leq 0.20$  in the univariate were included as level 2 variables in the multiple analysis. Finally, we added the individual characteristics (age, gender, employment status, number of parents and friend in the neighborhood, recognize people passing by the door of your house, residence length in the same neighborhood, presence of child younger than 10 and socioeconomic position) at level 1 for adjustment.

The analyses were performed in the software STATA (Stata Corp., College Station, Texas), version 12.0. For all analysis we used the svy command [44], that considers the complex design and sampling weights. For all models, we considered a significance level of 5%.

### **Ethical issues**

The study was approved by the Research Ethics Committee of the UFMG through opinion ETIC n° 253/06. All participants signed informed consent.

### **Results**

We found that 57.8% of the participants considered their neighborhood to be their own house until the end of the block, 23.3% considered their neighborhood to be the 5 closest blocks, 7.4% the nearest 10 blocks to their residence and 11.5% considered their neighborhood to be larger than 10 blocks from their home.

There was a linear relationship between the size of the perceived neighborhood and the time to walk to his/her neighborhood end, with the following average times in minutes for each neighborhood size stratum: 6.1, 13.5, 19.8 and 29.2.

The distribution of street connectivity was almost the same with 39.7% of streets with connectivity between 0 and 3; 24.8% with value 4 and 35.4% with values between 5 to 9. The mean population density was 12,264 residents/km<sup>2</sup> (685.9). All these results are on table 1.

1  
2  
3 The multi-level model analysis began with the null model. The perceived neighborhood size  
4 had significant variation within census tract, given the likelihood-ratio test ( $p < 0.001$ ). The  
5 analysis showed the following scales and variables significantly associated with the self-  
6 perceived neighborhood size (table 2): walking environment (OR=2.96; CI 95%: 1.29 – 3.82),  
7 violence (OR=1.35; CI95%: 1.12 – 1.62), female gender (OR= 0.81; CI 95%: 0.68 – 0.96),  
8 greater number of relatives living in the neighborhood (OR= 4.63; CI 95%: 2.84 – 7.57),  
9 recognition of more people in the neighborhood (OR= 3.33; CI 95%: 1.72 – 6.25) and,  
10 socioeconomic position (NEI) (OR= 1.17; CI 95%: 1.06 – 1.29) (Table 3).  
11  
12  
13  
14  
15

16 Based on the Akaike Information Criteria (AIC) the best models were adjusted by individual  
17 variables at level 1. The median value of the odds ratio comes from the median value between  
18 the area with highest odds to have more larger perceived neighborhood scale and the area with  
19 lowest odds when randomly picking out two areas [42]. We found a MOR of 1.62 for the null  
20 model; 1.58 for the model with the contextual predictors and also 1.58 for the one adjusted by  
21 the individual variables. The results of proportional change in variance show that the  
22 contextual predictors explained 10.7% of the total variance and the model with contextual and  
23 individual variables explained 9.0%. Although the best model based on the AIC criterion is  
24 the context plus individual variables, the model only with contextual variables has more  
25 variation when compared to the null model. It means that 10.0% of the contextual variance of  
26 perceived neighborhood scale was attributed to the contextual factors and that when we added  
27 the individual level it decreased a little to 9.0% (table 3).  
28  
29  
30  
31  
32  
33  
34  
35

## 36 Discussion

37 Perceived neighborhood scale was relatively small for many residents: 57.8% of the  
38 participants considered their neighborhood as residences closest to their home until the end of  
39 the block. Also, contextual factors such as perceived good environment conditions for  
40 walking and indicators of a violent environment were associated with a larger perceived  
41 neighborhood scale, even adjusted by individual-level variables.  
42  
43  
44  
45  
46

47 These findings allow some comparison with previous studies, but care must be taken because  
48 each study has different approaches in measuring perceived neighborhood scale. A study  
49 carried out in the city of Los Angeles [45] reported that 35.1% of the interviewees considered  
50 their neighborhood to be a block or street that they live on, 25.0% several blocks or streets in  
51 each direction, 28.8% as an area within a 15-minute walk and 13.1% considered their  
52 neighborhood as an area larger than a 15-minute walk. In other words, 86.9% of participants  
53  
54  
55  
56  
57  
58  
59  
60

1  
2  
3 considered their neighborhood as an area larger than 15-minute walk. This result is very  
4 similar to what we found, when we look to the average time taken to leave the self-perceived  
5 neighborhood within each stratum, 81.1% of participants considered their neighborhood as an  
6 area smaller than a 15-minute walk.  
7  
8

9  
10 Another study conducted in different areas of Seattle [25] found that 46.4% of participants  
11 considered their neighborhood as their own residential unit to no more than one block in each  
12 direction.  
13  
14

15 However, studies using maps as an approach to measure the perceived neighborhood scale  
16 found much larger neighborhoods. A study [24] conducted in five Europe urban regions found  
17 a mean of 1.96 km<sup>2</sup>. Similar results were found in a small study conducted with adolescents in  
18 Boston, where it was reported a mean area of 1.82 km<sup>2</sup>. Stewart et al [46], found in a pilot  
19 study conducted in Auckland (New Zealand) an area of 3.54 km<sup>2</sup>; Coulton et al [21], in a  
20 study with 6,224 adults in low-income communities in 10 US cities found an area of 2.33  
21 km<sup>2</sup>. A study conducted in Helsinki and Espoo, Finland, with 15,982 persons, that calculated  
22 the area inside the most visited points in a neighborhood, found an average area of 1.07 km<sup>2</sup>  
23 [47].  
24  
25  
26  
27  
28  
29

30 Despite the heterogeneities in the sampling and methods utilized between studies, researches  
31 that use maps found larger neighborhoods, indicating a possible relationship to the  
32 methodology used to access the perceived neighborhood scale. A possible explanation is that  
33 it is easier to remember important points in neighborhoods when participants look at a map.  
34 Using an open- or closed-ended question does not provide that kind of specific context.  
35  
36  
37  
38

39 The results of the multilevel model show us that there are contextual factors associated with  
40 perceived neighborhood scale. We found associations with the perceptions of the walking  
41 environment and with violence. The interpretation of the results of the scales should be done  
42 based on the analysis of the behavior of its score [38]. The walking environment scale had  
43 highest values when the census tract had more people who reported that their neighborhoods  
44 have a physical environmental that encourage mobility and external activities. To our  
45 knowledge, the literature does not report a similar relationship, but it is plausible that an area  
46 that stimulates the mobility of people, facilitating diverse activities within the neighborhood  
47 could be also related with a large perception of neighborhood scale.  
48  
49  
50  
51  
52  
53

54 Violence scale, which reports higher values for more violence neighborhoods, was associated  
55 with larger perceived neighborhood scale. This appears contradictory at first glance, but  
56  
57  
58  
59

1  
2  
3 people with larger perceived neighborhoods are likely to have greater social contact and  
4 exposure to the environment and may therefore be able to identify the problems within the  
5 neighborhood.  
6  
7

8 Regarding connectivity, we found association between high street connectivity and larger  
9 perceived neighborhood scale only in a univariate analysis, despite a negative association  
10 found in another publication[21]. After adjustments connectivity was no longer significant  
11 although the plausibility of the association; highly connected streets tend to be in busier  
12 places with a high demographic density and intense automobile traffic that hampers social  
13 contact and favors less extensive perceptions.  
14  
15  
16  
17

18 Demographic density was not associated with perceived neighborhood scale. The literature  
19 consulted differs in relation to this variable. Some studies have found [21 23] association  
20 between smaller perceived neighborhood scale and greater population density. Others have  
21 reported an association between higher population densities and larger neighborhoods [24 48]  
22 and further one, such ours, found no relationship [26 45]. However, neighborhoods with a  
23 high population density, especially if car traffic is intense could also impoverished social  
24 contact among neighbors favoring a lower neighborhood perception, in the same direction of  
25 connectivity.  
26  
27  
28  
29  
30  
31

32 This study has specific limitations that need to be mentioned as listed: 1. The use of a closed-  
33 ended question to obtain the perceived neighborhood scale does not specify the spaces that  
34 individuals are actually exposed to; 2. The cross-sectional design of the study limits the  
35 interpretation of some results, due to the possibility of reverse causality; 3. The results of this  
36 study are from a large urban center and are not necessarily valid for smaller cities and rural  
37 areas; 4. Perception of the neighborhood scale may differ depending upon the age of the  
38 participants since those younger than 18 years were not included in this study.  
39  
40  
41  
42  
43

44 The identification of the contextual factors associated with the perception of neighborhood  
45 scale have important methodological implications, especially for studies that intend to  
46 investigate an association of social factors of the neighborhood with health events. The  
47 perceived neighborhood scale is a fundamental tool for the creation of more precise and  
48 coherent neighborhood boundaries informed by the places actually experienced by  
49 individuals.  
50  
51  
52  
53

54 One of the motivations of this study is related with the fact of a large amount of research in  
55 eco-epidemiology and community practice tends to use artificial definitions of neighborhoods  
56  
57  
58  
59

1  
2  
3 boundaries. The results of this study show us that we have a big heterogeneity on perceived  
4 neighborhood scale, reinforcing the argument that researchers need to use more personalized  
5 way to define neighborhood boundaries. Most of researches use census tracts as a proxy of  
6 neighborhood due the availability of data aggregated to this level, but the increase use of GIS  
7 technique has been supported a more individualized neighborhood definition that can be used  
8 to avoid problems regarding the choice of neighborhood size and its operationalization. A  
9 better neighborhood definition will help future eco-epidemiological researches that can  
10 delivered a more robust evidence to support a better community practices.  
11  
12  
13  
14  
15  
16  
17  
18  
19  
20  
21  
22  
23  
24  
25  
26  
27  
28  
29  
30  
31  
32  
33  
34  
35  
36  
37  
38  
39  
40  
41  
42  
43  
44  
45  
46  
47  
48  
49  
50  
51  
52  
53  
54  
55  
56  
57  
58  
59  
60

## References

1. Roux AVD. Health in cities: is a systems approach needed? *Cadernos de Saúde Pública* 2015;**31**:9-13
2. Cohen D, Spear S, Scribner R, et al. " Broken windows" and the risk of gonorrhoea. *American journal of public health* 2000;**90**(2):230
3. Schaefer-McDaniel N, Caughy MOB, O'Campo P, et al. Examining methodological details of neighbourhood observations and the relationship to health: a literature review. *Social science & medicine* 2010;**70**(2):277-92
4. Diez Roux AV, Mair C. Neighborhoods and health. *Annals of the New York Academy of Sciences* 2010;**1186**(1):125-45
5. Roux AVD, Merkin SS, Arnett D, et al. Neighborhood of residence and incidence of coronary heart disease. *New England Journal of Medicine* 2001;**345**(2):99-106
6. Mair CF, Roux AVD, Galea S. Are neighborhood characteristics associated with depressive symptoms? A critical review. *Journal of epidemiology and community health* 2008;jech.2007.066605
7. Andrade ACdS, Peixoto SV, Friche AAdL, et al. Social context of neighborhood and socioeconomic status on leisure-time physical activity in a Brazilian urban center: The BH Health Study. *Cadernos de Saúde Pública* 2015;**31**:136-47
8. Fernandes AP, Andrade ACdS, Ramos CGC, et al. Leisure-time physical activity in the vicinity of Academias da Cidade Program in Belo Horizonte, Minas Gerais State, Brazil: the impact of a health promotion program on the community. *Cadernos de Saúde Pública* 2015;**31**:195-207
9. Chaix B, Kestens Y, Bean K, et al. Cohort Profile: Residential and non-residential environments, individual activity spaces and cardiovascular risk factors and diseases—The RECORD Cohort Study. *International Journal of Epidemiology* 2011;**107**:1-10
10. Ludwig J, Duncan GJ, Gennetian LA, et al. Neighborhood effects on the long-term well-being of low-income adults. *Science* 2012;**337**(6101):1505-10
11. Kaiser P, Diez Roux AV, Mujahid M, et al. Neighborhood environments and incident hypertension in the multi-ethnic study of atherosclerosis. *American journal of epidemiology* 2016;**183**(11):988-97
12. Johnson DA, Simonelli G, Moore K, et al. The neighborhood social environment and objective measures of sleep in the Multi-Ethnic Study of Atherosclerosis. *Sleep* 2017;**40**(1)
13. Chaix B, Merlo J, Evans D, et al. Neighbourhoods in eco-epidemiologic research: delimiting personal exposure areas. A response to Riva, Gauvin, Apparicio and Brodeur. *Social science & medicine* 2009;**69**(9):1306-10
14. Flowerdew R, Manley DJ, Sabel CE. Neighbourhood effects on health: does it matter where you draw the boundaries? *Social science & medicine* 2008;**66**(6):1241-55
15. Galster G. On the nature of neighbourhood. *Urban studies* 2001;**38**(12):2111-24
16. Santos SM, Chor D, Werneck GL. Demarcation of local neighborhoods to study relations between contextual factors and health. *International journal of health geographics* 2010;**9**(1):1
17. Clapp JM, Wang Y. Defining neighborhood boundaries: Are census tracts obsolete? *Journal of Urban Economics* 2006;**59**(2):259-84
18. Chaskin RJ. Perspectives on neighborhood and community: a review of the literature. *The Social Service Review* 1997:521-47
19. Chappell NL, Funk LM, Allan D. Defining community boundaries in health promotion research. *American Journal of Health Promotion* 2006;**21**(2):119-26
20. Chaix B, Meline J, Duncan S, et al. GPS tracking in neighborhood and health studies: a step forward for environmental exposure assessment, a step backward for causal inference? *Health & Place* 2013;**21**:46-51
21. Coulton C, Jennings MZ, Chan T. How Big is My Neighborhood? Individual and Contextual Effects

- on Perceptions of Neighborhood Scale. *American Journal of Community Psychology* 2012;1-11 doi: 10.1007/s10464-012-9550-6[published Online First: Epub Date]].
22. Coulton CJ, Korbin J, Chan T, et al. Mapping residents' perceptions of neighborhood boundaries: a methodological note. *American journal of community psychology* 2001;**29**(2):371-83
23. Haney W, Knowles E. Perception of neighborhoods by city and suburban residents. *Human Ecology* 1978;**6**(2):201-14 doi: 10.1007/bf00889095[published Online First: Epub Date]].
24. Charreire H, Feuillet T, Roda C, et al. Self-defined residential neighbourhoods: size variations and correlates across five European urban regions. *Obesity Reviews* 2016;**17**(S1):9-18
25. Guest AM, Lee BA. How urbanites define their neighborhoods. *Population and Environment* 1984;**7**(1):32-56
26. Pebley AR, Sastry N. Our place: perceived neighborhood size and names in Los Angeles. Los Angeles: California Center for Population Research, University of California 2009
27. Célio FdA, Xavier CC, Andrade ACdS, et al. Características individuais associadas à autopercepção da extensão territorial da vizinhança. *Cadernos de Saúde Pública* 2014;**30**:1935-46
28. Cutchin MP, Eschbach K, Mair CA, et al. The socio-spatial neighborhood estimation method: an approach to operationalizing the neighborhood concept. *Health & place* 2011;**17**(5):1113-21
29. Fotheringham AS, Wong DW. The modifiable areal unit problem in multivariate statistical analysis. *Environment and planning A* 1991;**23**(7):1025-44
30. Duncan DT, Kawachi I, Subramanian SV, et al. Examination of How Neighborhood Definition Influences Measurements of Youths' Access to Tobacco Retailers: A Methodological Note on Spatial Misclassification. *American Journal of Epidemiology* 2013 doi: 10.1093/aje/kwt251[published Online First: Epub Date]].
31. Sampson RJ, Morenoff JD, Gannon-Rowley T. Assessing" neighborhood effects": Social processes and new directions in research. *Annual review of sociology* 2002:443-78
32. Hillier B. Spatial sustainability in cities: organic patterns and sustainable forms. 2009
33. Andrade RGd, Chaves OC, Costa DAdS, et al. Overweight in men and women among urban area residents: individual factors and socioeconomic context. *Cadernos de Saúde Pública* 2015;**31**:148-58
34. Camargos VP, César CC, Caiaffa WT, et al. Imputação múltipla e análise de casos completos em modelos de regressão logística: uma avaliação prática do impacto das perdas em covariáveis. *Cad Saúde Pública* 2011;**27**:2299-313
35. Ferreira AD, César CC, Malta DC, et al. Validade de estimativas obtidas por inquérito telefônico: comparação entre VIGITEL 2008 e Inquérito Saúde em Beagá. *Rev Bras Epidemiol* 2011;**14**(1):16-30
36. Gerência de Epidemiologia e Informação Secretaria Municipal de Saúde de Belo Horizonte. Índice de vulnerabilidade à saúde. Secondary Índice de vulnerabilidade à saúde 2003. <http://www.pbh.gov.br/smsa/biblioteca/gabinete/risco2003>.
37. Friche AA, Xavier CC, Proietti FA, et al. *Saúde urbana em Belo Horizote*. 1 ed, 2015.
38. Friche AA, Diez-Roux AV, Cesar CC, et al. Assessing the Psychometric and Ecometric Properties of Neighborhood Scales in. *Journal of urban health : bulletin of the New York Academy of Medicine* 2012 doi: 10.1007/s11524-012-9737-z[published Online First: Epub Date]].
39. Song Y, Knaap G-J. Measuring urban form: Is Portland winning the war on sprawl? *Journal of the American Planning Association* 2004;**70**(2):210-25
40. Demográfico IC. Resultados do universo. Rio de Janeiro: IBGE 2010
41. Barros AJ, Victora CG. Indicador econômico para o Brasil baseado no censo demográfico de 2000. *Revista de Saúde Pública* 2005;**39**(4):523-29
42. Merlo J, Chaix B, Ohlsson H, et al. A brief conceptual tutorial of multilevel analysis in social epidemiology: using measures of clustering in multilevel logistic regression to investigate contextual phenomena. *J Epidemiol Community Health* 2006;**60**(4):290-7 doi: 10.1136/jech.2004.029454[published Online First: Epub Date]].
43. Twisk J. *Applied multilevel analysis: a practical guide*. 2006: Cambridge University Press, Cambridge, UK.



- 1  
2  
3 44. StataCorp L. Stata survey data reference manual, 1985.  
4 45. Sastry N, Pebley AR, Zonta M. Neighborhood definitions and the spatial dimension of daily life in  
5 Los Angeles. California Center for Population Research 2002  
6 46. Stewart T, Duncan S, Chaix B, et al. A novel assessment of adolescent mobility: a pilot study.  
7 International journal of behavioral nutrition and physical activity 2015;**12**(1):18  
8 47. Hasanzadeh K, Broberg A, Kyttä M. Where is my neighborhood? A dynamic individual-based  
9 definition of home ranges and implementation of multiple evaluation criteria. Applied  
10 Geography 2017;**84**:1-10  
11 48. Vallée J, Le Roux G, Chaix B, et al. The 'constant size neighbourhood trap' in accessibility and  
12 health studies. Urban Studies 2014:0042098014528393  
13  
14  
15  
16  
17  
18  
19  
20  
21  
22  
23  
24  
25  
26  
27  
28  
29  
30  
31  
32  
33  
34  
35  
36  
37  
38  
39  
40  
41  
42  
43  
44  
45  
46  
47  
48  
49  
50  
51  
52  
53  
54  
55  
56  
57  
58  
59  
60

**Table 1.** Univariate analysis of individual variables by perceived neighborhood scale: percentages, means and standard deviations.

| INDIVIDUAL VARIABLES                                                         | Perceived Neighborhood scale (1-4 and %)* |              |              |              | OR (CI 95 %) <sup>1</sup> | p      |
|------------------------------------------------------------------------------|-------------------------------------------|--------------|--------------|--------------|---------------------------|--------|
|                                                                              | 1<br>(57.8%)                              | 2<br>(23.3%) | 3<br>(7.4%)  | 4<br>(11.5%) |                           |        |
| Gender (female)                                                              | 56.4                                      | 51.0         | 45.9         | 45.9         | 1.42 (1.20 - 1.70)        | <0.001 |
| Employment state (working)                                                   | 62.0                                      | 65.6         | 69           | 73.3         | 1.36 (1.14 - 1.61)        | <0.001 |
| Presence of child younger than 10 years (yes)                                | 33.1                                      | 31.5         | 30.6         | 33.0         | 0.95 (0.82 - 1.11)        | 0.540  |
| Number of relatives and friends living in the same neighborhood (almost all) | 2.92                                      | 7.07         | 7.83         | 13.03        | 6.30 (4.00 - 9.92)        | <0.001 |
| Recognizes most of them people passing by the door of his/her house (yes)    | 8.0                                       | 12.6         | 13.1         | 21.3         | 5.55 (3.04 - 10.11)       | <0.001 |
|                                                                              | Mean (Standard deviation)                 |              |              |              | OR (CI 95 %) <sup>1</sup> | p      |
| Age (years)                                                                  | 44.7 (0.35)                               | 44.9 (0.57)  | 41.1 (0.92)  | 43.2 (0.74)  | 0.99 (0.99 - 1.00)        | 0.060  |
| Socioeconomic position (NEI) **                                              | 586.8 (4.06)                              | 601.6 (6.6)  | 582.8 (11.4) | 601.4 (0.0)  | 1.13 (1.04 - 1.23)        | <0.001 |
| Time of residence in the same neighborhood (years)                           | 14.8 (0.26)                               | 16.8 (0.44)  | 16.2 (0.71)  | 16.6 (0.60)  | 1.01 (1.01 -1.02)         | <0.001 |

\* (1) up to the block or street you live on; (2) within 5 blocks; (3) within ten blocks; and (4) more than ten blocks away; OR – odds ratio; CI 95% – 95% confidence interval; NEI - national economic index; \*\* Odds ratio calculated based on an increase of 200 NEI points; <sup>1</sup> estimated by a multilevel ordinal logistic regression model, the reference category is the smaller neighborhood.

**Table 2.** Univariate analysis of contextual variables by perceived neighborhood scale: percentages, means and standard deviations.

| CONTEXTUAL VARIABLES                      | NEIGHBORHOOD EXTENSION SCALE (1-4 and %)* |                      |                      |                      | OR (CI 95 %) <sup>1</sup> | p      |
|-------------------------------------------|-------------------------------------------|----------------------|----------------------|----------------------|---------------------------|--------|
|                                           | 1<br>(57.8%)                              | 2<br>(23.3%)         | 3<br>(7.4%)          | 4<br>(11.5%)         |                           |        |
| Connectivity <sup>2</sup>                 |                                           |                      |                      |                      |                           |        |
| 0 to 3                                    | 39.91                                     | 40.91                | 41.87                | 40.37                | 1.00                      |        |
| 4                                         | 23.92                                     | 23.42                | 36.11                | 25.28                | 1.04 (0.83 - 1.30)        | 0.760  |
| 5 to 9                                    | 37.17                                     | 35.63                | 22.02                | 34.34                | 0.85 (0.70 - 1.04)        | 0.120  |
|                                           | Mean (Standard deviation)                 |                      |                      |                      | OR (CI 95 %) <sup>1</sup> | p      |
| Aesthetic Quality scale                   | 2.96 (0.03)                               | 3.07 (0.04)          | 3.06 (0.07)          | 3.09 (0.04)          | 1.23 (1.03 - 1.46)        | 0.020  |
| Walking Environment scale                 | 3.20 (0.01)                               | 3.24 (0.02)          | 3.27 (0.02)          | 3.28 (0.02)          | 3.37 (2.09 - 5.44)        | <0.001 |
| Violence scale                            | 1.90 (0.02)                               | 1.95 (0.03)          | 1.89 (0.05)          | 2.00 (0.04)          | 1.20 (1.03 - 1.40)        | 0.020  |
| Safety scale                              | 2.96 (0.03)                               | 2.93 (0.05)          | 2.89 (0.09)          | 2.86 (0.05)          | 0.92 (0.79 - 1.08)        | 0.190  |
| Population density (per square kilometer) | 12487.35<br>(791.26)                      | 11740.34<br>(704.83) | 12274.31<br>(740.63) | 12627.22<br>(865.05) | 1.00 (0.99 - 1.01)        | 0.650  |

\* (1) up to the block or street you live on; (2) within 5 blocks; (3) within ten blocks; and (4) more than ten blocks away; OR – odds ratio; CI 95% – 95% confidence interval. <sup>1</sup> estimated by a multilevel ordinal logistic regression model, the reference category is the smaller neighborhood; <sup>2</sup> 0 means poorly connected streets and 9 heavily connected streets.

**Table 3.** Multilevel ordinal logistic regression for the resident perceived neighborhood scale

| Variables                                                                    | Null Model | Contextual variables     |         | Contextual variables + individual variables |         |
|------------------------------------------------------------------------------|------------|--------------------------|---------|---------------------------------------------|---------|
|                                                                              |            | OR (CI 95%) <sup>1</sup> | p       | OR (CI 95%) <sup>1</sup>                    | p       |
| Aesthetic Quality scale                                                      |            | 1.21 (0.97 - 1.41)       | 0.060   | 1.13 (0.92 - 1.39)                          | 0.230   |
| Walking Environment scale                                                    |            | 2.96 (1.71 - 5.13)       | <0.001  | 2.22 (1.29 - 3.82)                          | <0.001  |
| Violence scale                                                               |            | 1.35 (1.12 - 1.62)       | <0.001  | 1.23 (1.01 - 1.51)                          | 0.040   |
| Safety scale                                                                 |            | 0.97 (0.82 - 1.14)       | 0.710   | 0.99 (0.83 - 1.19)                          | 0.950   |
| Connectivity <sup>2</sup>                                                    |            |                          |         |                                             |         |
| 4                                                                            |            | 1.00 (0.80 - 1.26)       | 0.940   | 1.06 (0.85 - 1.34)                          | 0.570   |
| 5 e 9                                                                        |            | 0.82 (0.67 - 1.01)       | 0.060   | 0.89 (0.72 - 1.11)                          | 0.310   |
| <b>INDIVIDUAL</b>                                                            |            |                          |         |                                             |         |
| Age (years)                                                                  |            |                          |         | 1.00 (0.99 - 1.00)                          | 0.350   |
| Gender (female)                                                              |            |                          |         | 0.81 (0.68 - 0.96)                          | 0.020   |
| Number of relatives and friends living in the same neighborhood (almost all) |            |                          |         | 4.63 (2.84 - 7.57)                          | <0.001  |
| Recognizes most of them people passing by the door of his/her house (yes)    |            |                          |         | 3.33 (1.72 - 6.25)                          | <0.001  |
| Employment state (working)                                                   |            |                          |         | 1.26 (1.06 - 1.50)                          | 0.010   |
| Time of residence in the same neighborhood (years)                           |            |                          |         | 1.01 (1.00 - 1.01)                          | 0.130   |
| Presence of child younger than 10 years old (yes)                            |            |                          |         | 0.97 (0.81 - 1.16)                          | 0.740   |
| Socioeconomic position**                                                     |            |                          |         | 1.17 (1.06 - 1.29)                          | <0.001  |
| <b>MODEL INFORMATION</b>                                                     |            |                          |         |                                             |         |
| Variance                                                                     | 0.2567     |                          | 0.2292  |                                             | 0.2336  |
| MOR                                                                          | 1.62       |                          | 1.58    |                                             | 1.58    |
| Proportional change in variance                                              | -          |                          | 10.71   |                                             | 9.00    |
| AIC                                                                          | 8749.26    |                          | 8668.44 |                                             | 8091.83 |

OR – odds ratio; CI 95% – 95% confidence interval; NEI - national economic index; MOR - median values of the odds ratio; AIC - Akaike Information Criterion; \*\* Odds ratio calculated based on an increase of 200 NEI points; <sup>1</sup> estimated by a multilevel ordinal logistic regression model, the reference category is the smaller neighborhood; <sup>2</sup> 0 means connected streets and 9 heavily connected streets.

## Figure legends

Figure 1 - Theoretical model for perceived neighborhood scale

### Contributors:

**de Almeida Celio, Fabiano de Almeida:** Fabiano participated in the design of the study, its conception. Fabiano was responsible for writing the article and the following activities: He setting up the database, he made the statistical analysis, he reviewed the text, and approved the final version.

**Friche, Amélia Augusta de Lima:** Professor Friche participated in the design and construction of the field work; reviewed all versions of the work, ensured its accuracy and integrity and she approved the final version.

**Jennings, M. Zane:** Zane participated in design; ensured the accuracy and integrity of the data; approved all versions of the work and the final version.

**Andrade, Amanda Cristina de Souza:** Amanda participated in the design of the work, review all versions, statistical analysis, ensured the accuracy and precision of the data, approved the final version.

**Xavier, Cesar Coelho:** Professor Xavier participated in the design and construction of the field work; reviewed all versions of the work, ensured its accuracy and integrity and he approved the final version.

**Proietti, Fernando:** Professor Proietti participated in the design and construction of the field work; reviewed all versions of the work, ensured its accuracy and integrity and he approved the final version.

**Coulton, Claudia J.:** Professor Coulton participated in design; ensured the accuracy and integrity of the data; approved all versions of the work and the final version.

**Caiaffa, Waleska Teixeira:** Professor Caiaffa participated in the design and construction of the field work; reviewed all versions of the work, ensured its accuracy and integrity and she approved the final version.

1  
2  
3  
4  
5  
6  
7  
8 **Funding by:**

9 National Health Fund of the Ministry of Health, Fapemig, CNPq, NIH / Fogarty International Center.

11 **Competing Interests Declaration:**

12 All authors declare they have no actual or potential competing financial interest.  
13  
14  
15

16 **Data sharing:**

17 All relevant data are within the paper. The data underlying this study are third party data and are available to all interested researchers. To submit  
18 a proposal the OSUBH Coordinating Center at <http://site.medicina.ufmg.br/osubh/contato/>.  
19  
20  
21  
22  
23  
24  
25  
26  
27  
28  
29  
30  
31  
32  
33  
34  
35  
36  
37  
38  
39  
40  
41  
42  
43  
44  
45  
46  
47

1  
2  
3  
4  
5  
6  
7  
8  
9  
10  
11  
12  
13  
14  
15  
16  
17  
18  
19  
20  
21  
22  
23  
24  
25  
26  
27  
28  
29  
30  
31  
32  
33  
34  
35  
36  
37  
38  
39  
40  
41  
42  
43  
44  
45  
46  
47  
48  
49  
50  
51  
52  
53  
54  
55  
56  
57  
58  
59  
60

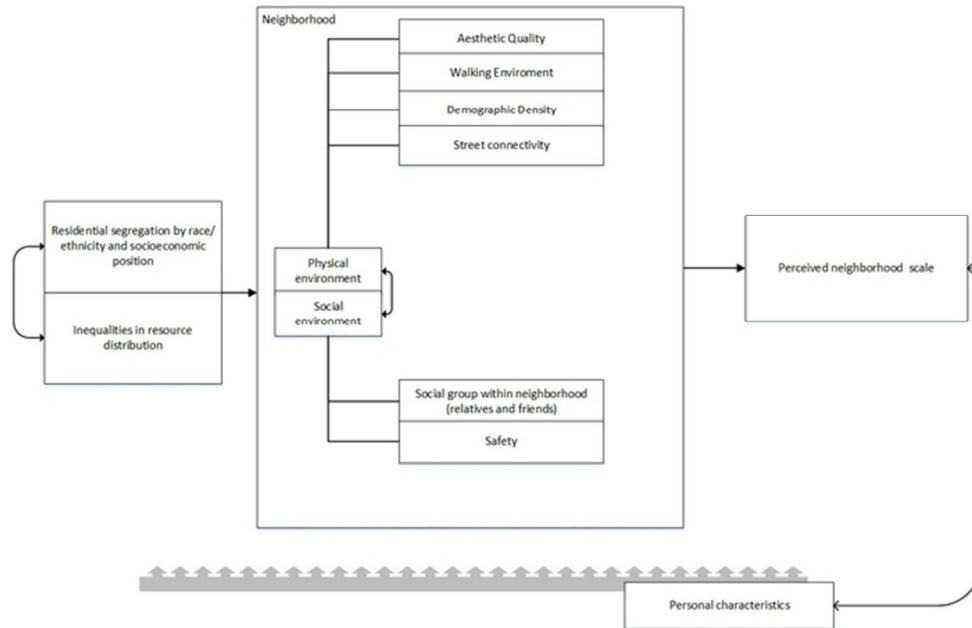

Theoretical Model for perceived neighborhood scale

30x19mm (600 x 600 DPI)

Review only

# BMJ Open

## Contextual characteristics associated with the perceived neighborhood scale, in a cross-sectional study in a large urban center in Brazil

|                                 |                                                                                                                                                                                                                                                                                                                                                                                                                                                                                                                                                                                                                                                                                                                                                                  |
|---------------------------------|------------------------------------------------------------------------------------------------------------------------------------------------------------------------------------------------------------------------------------------------------------------------------------------------------------------------------------------------------------------------------------------------------------------------------------------------------------------------------------------------------------------------------------------------------------------------------------------------------------------------------------------------------------------------------------------------------------------------------------------------------------------|
| Journal:                        | <i>BMJ Open</i>                                                                                                                                                                                                                                                                                                                                                                                                                                                                                                                                                                                                                                                                                                                                                  |
| Manuscript ID                   | bmjopen-2017-021445.R1                                                                                                                                                                                                                                                                                                                                                                                                                                                                                                                                                                                                                                                                                                                                           |
| Article Type:                   | Research                                                                                                                                                                                                                                                                                                                                                                                                                                                                                                                                                                                                                                                                                                                                                         |
| Date Submitted by the Author:   | 09-Apr-2018                                                                                                                                                                                                                                                                                                                                                                                                                                                                                                                                                                                                                                                                                                                                                      |
| Complete List of Authors:       | de Almeida Celio, Fabiano; Universidade Federal de Minas Gerais, Public health<br>Friche, Amélia Augusta ; Universidade Federal de Minas Gerais Faculdade de Medicina, Public health<br>Jennings, M. Zane; Case Western Reserve University Jack Joseph and Morton Mandel School of Applied Social Sciences<br>Andrade, Amanda Cristina; Universidade Federal de Minas Gerais Faculdade de Medicina, public health<br>Xavier, Cesar ; faculdade de saúde e ecologia humana<br>Proietti, Fernando; Faculdade de Saúde e Ecologia Humana; Centro de Pesquisas Rene Rachou<br>Coulton, Claudia J.; Case Western Reserve University Jack Joseph and Morton Mandel School of Applied Social Sciences<br>Caiaffa, Waleska; Federal University of Minas Gerais, Medicine |
| <b>Primary Subject Heading</b>: | Epidemiology                                                                                                                                                                                                                                                                                                                                                                                                                                                                                                                                                                                                                                                                                                                                                     |
| Secondary Subject Heading:      | Public health                                                                                                                                                                                                                                                                                                                                                                                                                                                                                                                                                                                                                                                                                                                                                    |
| Keywords:                       | neighborhood, urban health, Perceived Neighborhood, neighborhood scale, Community perceptions                                                                                                                                                                                                                                                                                                                                                                                                                                                                                                                                                                                                                                                                    |
|                                 |                                                                                                                                                                                                                                                                                                                                                                                                                                                                                                                                                                                                                                                                                                                                                                  |

SCHOLARONE™  
Manuscripts



1  
2  
3 **Contextual characteristics associated with the perceived neighborhood scale, in a cross-**  
4 **sectional study in a large urban center in Brazil**

5  
6 **Corresponding author: Fabiano de Almeida Célio, [maitiz@gmail.com](mailto:maitiz@gmail.com), +55 31 99877 7761**  
7

8  
9 1) **Fabiano de Almeida Célio**<sup>1</sup>, [maitiz@gmail.com](mailto:maitiz@gmail.com); 2) **Amélia Augusta de Lima Friche**<sup>1</sup>,  
10 [gutafriche@gmail.com](mailto:gutafriche@gmail.com); 3) **M. Zane Jennings**<sup>2</sup>, [mzj@case.edu](mailto:mzj@case.edu); 4) **Amanda Cristina de**  
11 **Souza Andrade**<sup>1</sup>, [amandasouza\\_est@yahoo.com.br](mailto:amandasouza_est@yahoo.com.br); 5) **Cesar Coelho Xavier**<sup>3</sup>,  
12 [cesarxavier@gmail.com](mailto:cesarxavier@gmail.com); 6) **Fernando Augusto Proietti**<sup>3</sup>, [fernandoaproietti@gmail.com](mailto:fernandoaproietti@gmail.com); 7)  
13 **Claudia J. Coulton**<sup>2</sup>, [claudia.coulton@case.edu](mailto:claudia.coulton@case.edu); 8) **Waleska Teixeira Caiaffa**<sup>1</sup>,  
14 [caiaffa.waleska@gmail.com](mailto:caiaffa.waleska@gmail.com)  
15

16  
17 1. Belo Horizonte Observatory for Urban Health, School of Medicine, Federal University of  
18 Minas Gerais, Belo Horizonte, Minas Gerais, Brazil,

19 2. Case Western Reserve University Jack Joseph and Morton Mandel School of Applied  
20 Social Sciences, Cleveland OH, USA

21 3. Faculdade de Saúde e Ecologia Humana, Vespasiano, Minas Gerais, Brazil

22 4. Centro de Pesquisas Rene Rachou, Belo Horizonte, Minas Gerais, Brazil  
23

24 **Keywords:** neighborhood, urban health; Perceived Neighborhood; neighborhood scale,  
25 Community perceptions  
26

27 **Word count:** 3741  
28

29 **Reference count:** 48  
30

31 **Abstract**  
32

33  
34 **Introduction:** Health outcomes have been associated with physical and social characteristics  
35 of neighborhoods, but little is known about the relationship between contextual factors and  
36 perceived neighborhood scale. **Objective:** To identify the contextual factors associated with  
37 self-perceived neighborhood scale. **Methods:** We analyzed data from a cross-sectional  
38 population-based study in Belo Horizonte, Brazil, 2008-2009. The dependent variable was  
39 perceived neighborhood encoded as an ordinal scale based upon a brief description of the  
40 concept of the neighborhood and two independent scales relating distance, expressed in terms  
41 of geography and time. Street connectivity, demographic density and residents' perceptions of  
42 the neighborhoods' physical and social environment were used as contextual predictors.  
43 Individual characteristics were used as co-variates. Multilevel ordinal logistic regression  
44 models estimated the association between perceived neighborhood scale and contextual  
45 characteristics. **Results:** Resident's that perceive better walkability (OR=2.96; CI 95%: 1.29 –  
46 3.82) and high amounts of violence (OR=1.35; CI95%: 1.12 – 1.62) perceived their  
47 neighborhoods to be larger, even after adjusting for individual's characteristics. **Conclusion:**  
48  
49  
50  
51  
52  
53  
54  
55  
56  
57  
58  
59  
60

1  
2  
3 There are contextual factors that are associated with self-perceived neighborhood scale.  
4 Careful definition of neighborhood scale is a key factor in improving the results of eco-  
5 epidemiological studies. Although these findings must be further explored in other studies,  
6 these results can contribute to a better understanding of an appropriate choice of  
7 neighborhood scale, especially for cities in Latin America.  
8  
9  
10

## 11 **Summary Boxes:**

### 12 **Strengths and limitations of this study:**

- 13 • Large sample of an urban center in Latin America
- 14 • Analysis includes individual and contextual factors
- 15 • Neighborhood definition that can be obtained by closed question
- 16 • Analysis was able to identify the context factors associated with the perceived
- 17 neighborhood scale
- 18 • Analysis takes into account physical and social factors of the neighborhood
- 19
- 20
- 21
- 22
- 23
- 24
- 25

### 26 **What is already known on this subject?**

27  
28  
29 Neighborhood context has been found to affect health outcomes and health-affecting  
30 behaviors. In these studies, researchers typically select administratively defined geographic  
31 units such as census units or municipal boundaries as a proxy for neighborhood. However,  
32 studies based on census units do not take into account that there may be individual differences  
33 in how the neighborhood is experienced. Surveys that use the self-perceived neighborhood.  
34 may be advantageous in comparison to the census tract, because it is closer to the places  
35 actually experienced by the individual.  
36  
37  
38  
39  
40

### 41 **What does this study add?**

42  
43 Despite research results indicating a relationship between neighborhood and health, it is still  
44 rare to find studies that measure the influence of contextual factors as shaped by perceived  
45 neighborhood scale. In Latin America, we have not found any studies with this same purpose.  
46 This study investigated the contextual factors associated with perceived neighborhood scale in  
47 a large urban center in Latin America and provides an approach that may be useful to other  
48 studies that are considering a territorial unit of analysis.  
49  
50  
51  
52  
53  
54  
55  
56  
57  
58  
59  
60

## Introduction

Eco-epidemiological research has increasingly used the concept of neighborhood as the geographical area within which physical and social environmental features affect individuals' health outcomes, as part of an emphasis on a more holistic understanding of the factors and processes shaping health outcomes within urban areas [1].

Features in the neighborhood help explain inequalities in health; can be used in studies aiming to evaluate community interventions that intended to improve health outcomes [2-4] and, have been shown to be predictive of health outcomes and health-affecting behaviors such as cardiovascular diseases [5], sexually transmitted diseases [2], mental illness [6], physical activity [7 8], among others [9-12].

However, neighborhood is a complex concept and its definitions in epidemiological studies vary widely [13], with different methodological approaches [14]. Chaix et al (2009) describe two approaches that have been used to define neighborhood in epidemiological research: *the territorial neighborhood and the ego-centered neighborhood approaches*.

*Territorial neighborhoods* are generally administrative areas corresponding to a territory-subdividing approach. But more complex definitions of territorial neighborhoods may consider built environment features and population characteristics. Researchers using this approach often select administratively-defined, mutually exclusive geographic units such as census tract or municipal boundaries as a proxy for neighborhood [13 15]. Assuming resident homogeneity [16 17], this approach is adopted because secondary data is often easily available and spatial references are obtainable, which facilitates reproducibility and comparability across studies or over time. However, territorial neighborhoods consider the same areas for different individuals and due to this, individual differences in neighborhood experience and exposure cannot be captured under this approach [18 19]. When the same area is attributed to several individuals in a given area, the potential for error is introduced because individuals may not be exposed in a homogeneous way to the physical and social environment of the territory.

The second approach is called *ego-centered neighborhoods* and is based upon the idea that the contextual factors affecting individuals will differ depending on the actual location and particular geographic circumstances of those individuals. Several techniques can be used to define this approach. Most importantly, the ego-centered neighborhood results in neighborhoods that may overlap, are not mutually exclusive, and which are specific to the

1  
2  
3 household or individual resident [13]. This approach can be operationalized in three different  
4 ways. One uses a buffer, generally a circular area centered upon the individual's residence,  
5 resulting in neighborhoods of the same size, though made up of different areas, which may  
6 overlap one another but are not identical. The second approach involves using individual  
7 behavioral activity spaces measured by GPS. This captures each individual's movements and  
8 activities, creating a unique measure of contextual exposure [9 20]. The third method relies on  
9 individuals perceived neighborhoods.  
10  
11  
12  
13

14 Perceived neighborhoods, in turn, can be identify by different strategies. Residents may be  
15 asked to identify or draw their neighborhood on a map [21-24] or alternatively, researchers  
16 may ask residents how large they consider their neighborhood to be or how long it takes to  
17 walk from the resident's house to the end of their neighborhood [13 25-27]. This last  
18 technique has the advantage of being easily understood by residents and quickly and  
19 inexpensively done by researchers.  
20  
21  
22  
23

24 Regardless of the methods, neighborhood scale needs to be carefully considered. When it is  
25 not correctly operationalized and defined, the measures derived can be considered  
26 problematic and questionable. Consequently, the understanding of health impacts through the  
27 lens of the neighborhood can be undermined [28]. One problem that may arise is known in  
28 geography as the [29] "modifiable area unit problem". Aggregating epidemiological data into  
29 differently sized territorial units can yield varying exposure measures results, making it  
30 difficult or even impossible to compare findings. Generally, the error of choice of territorial  
31 unit of analysis is non-differential, which may underestimate association measures or even not  
32 find associations when they do exist [30].  
33  
34  
35  
36  
37  
38  
39

40 The attributes that make the neighborhood of an individual a singular place are commonly  
41 described as: a) social interaction; b) social norms and collective effectiveness; c) institutional  
42 resources (schools, health facilities and others) and d) routine activities within the  
43 neighborhood. As we can see, it is difficult not to incur some kind of neighborhood boundary  
44 definition error when the internal dynamics of the place under study are unknown [31].  
45  
46  
47  
48

49 Perceived neighborhood scale has been found to be related to individual characteristics such  
50 as socioeconomic position, employment, evaluation of the aesthetic aspects, the number of  
51 relatives living in the same neighborhood and familiarity with many people in the  
52 neighborhood [27]. However, the scale of perceived neighborhood can be influenced by  
53 contextual factors as population density, land use patterns, and collective efficacy [21]. The  
54  
55  
56  
57  
58  
59  
60

connectivity of the streets that directly influence the number of routes available to the various points of interest within a neighborhood can also influence the perception of its size, because connectivity may change the way residents use and circulate in physical space [32].

This work, by investigating perceived neighborhood scale, addresses an important methodological question, which concerns the appropriate scale of territorial units of analysis, reducing possible errors inherent to the process of investigating neighborhood impact on health outcomes. Despite research results indicating a relationship between neighborhood and health, it is still rare to find studies that measure the influence of contextual factors as shaped by perceived neighborhood scale. In Latin America, we have not found any studies with this same purpose. Therefore, the objective of this study is to analyze the context attributes associated with the perceived neighborhood scale in a large urban center in Brazil.

## Methods

### Data and Sample

The data for this study come from a cross-sectional population-based study called *BH Health Study*, conducted by the Belo Horizonte Observatory for Urban Health (OSUBH), nested at the Federal University of Minas Gerais (UFMG), in 2008-9. The participants of the study were residents belonging to two of the nine sanitary districts of the Belo Horizonte City: Barreiro and West. These districts were selected because they presented heterogeneity within the city in relation to social, socio-demographic and health indicators [33-35].

A stratified sample was selected in a three-stage process. To ensure the presence of residents in all socio-economic levels, the study area was stratified by the health vulnerability index [36], a geocoded index created by combining social, demographic, economic, and health indicators from different sources for each census tract. At the end of first and second steps of sampling process, 149 census tracts and 4,048 households were randomly selected. In the third stage, one resident over 18 years old was randomly selected in each of the identified households [37].

### Contextual predictors

The dependent variable for this study is the perceived neighborhood scale that was encoded as an ordinal variable originally with 7 options. To obtain the scale the interviewer read a brief description of the concept of the neighborhood: "neighborhood is the place where you live and perform routine tasks such as going to the bakery, grocery store, local businesses, visit

1  
2  
3 your neighbors and walk. Neighborhood can be understood as the area where you recognize  
4 most of the people". Then the interviewee was asked: "Thinking of your neighborhood, would  
5 you describe it as including: (1) The next-door houses; (2) The block or street you live on; (3)  
6 within 5 blocks; (4) within ten blocks; (5) more than ten blocks away, but less than your  
7 neighborhood; (6) your neighborhood; (7) your neighborhood and neighborhood nearby.  
8 Subsequently, this variable was recoded, using as reference an additional measure of  
9 neighborhood scale. This was a continuous variable obtained from the following question:  
10 "How much time in minutes would you spend walking from the door of your house to the end  
11 of what you consider your neighborhood?". The mean of walking time obtained for each of  
12 the seven options of the first ordinal question variable was used to collapse the final  
13 dependent variable into four options. This procedure was adopted by considering the non-  
14 overlapping of the 95% confidence intervals (95% CI) between each stratum. Thus, the  
15 outcome variable named Perceived neighborhood scale was recoded into four categories: (1)  
16 up to the block or street you live on; (2) within 5 blocks; (3) within ten blocks; and (4) more  
17 than ten blocks away.  
18  
19  
20  
21  
22  
23  
24  
25  
26

### 27 **Independent variables**

28  
29 The independent variables were chosen based on the theoretical (Figure 1) model using other  
30 studies [4 27]. The variables relating to the physical and social environment of the  
31 neighborhood were obtained from domains created by Friche et al [38]. Aggregated for each  
32 census tract the domains provide a continuous score ranging from 1 to 4. In this study, we  
33 used the following ones: aesthetic quality, walking environment, safety and violence.  
34  
35  
36  
37

38 The aesthetic quality domain was obtained by asking the participants the following about their  
39 neighborhood: 1) Has trash a litter on the streets and sidewalks? 2) Is pleasant for children? 3)  
40 Is pleasant for young children and adolescents? 4) Has trees that make the environment  
41 pleasant?  
42  
43  
44

45 The walking environment domain was obtained by asking the participants the following about  
46 their neighborhood: 1) How you evaluate the public places for sports and leisure? 2) How you  
47 evaluate the traffic? 3) Are there stores at a distance you can walk? 4) Is it easy to walk? 5)  
48 How often do you see other people walking? 6. How often do you see other people  
49 exercising? 7) Do you feel safe walking during the day?  
50  
51  
52  
53

54 The violence domain was comprised by the following questions: During the past 12 months,  
55 did you see or heard about: 1) People being mugged in the neighborhood streets; 2) People  
56  
57  
58  
59  
60

1  
2  
3 fighting using weapon; 3) People being killed by guns; 4) People being victims of sexual  
4 violence; 5) Women of the neighborhood being beaten by their husband and/or partners or  
5 relatives; 6) Children or adolescents of the neighborhood assaulted or victims of violence by  
6 their parents.  
7  
8

9  
10 The safety domain was built with the following questions: In your neighborhood: 1) You feel  
11 safe walking during the night; 2) Violence is a problem  
12

13  
14 This study also used contextual variables from census tract and collected by the city hall for  
15 administrative purposes. Street connectivity drawn from all street segments of the area of the  
16 study was obtained using Dephmapx software. This software handles the street segment as if  
17 it were an axial line, and quantifies the segments that intersect each of this lines [32]. The  
18 software delivers a score between 0 a 9, where 0 represents streets with low connectivity and  
19 9 represents high connected streets[39]. The final variable was skewed, with low prevalence  
20 of extreme values, so it was recoded into three categories: low connectivity (0 to 3); medium  
21 connectivity (4) and, high connectivity (5 to 9).  
22  
23  
24  
25  
26

27 Population density was calculated for each census tract using data from the 2010 National  
28 Census [40].  
29  
30

### 31 **Individual variables**

32  
33 Individual characteristics were included as co-variates that had been found to be predictors of  
34 neighborhood scale in previous studies [21 27]. They were: gender, age (in years),  
35 employment status, length of residence in home (in years), presence of children under 10  
36 years of age in household, number of relatives in the same neighborhood (none to all),  
37 number of people who pass in front of participant's house that are known to them (none to  
38 all), and a composite indicator, named national economic index (NEI), which depicts the  
39 current socioeconomic position of the individual, [41], based upon consumer goods instead of  
40 income.  
41  
42  
43  
44  
45  
46

### 47 **Statistical analyses**

48  
49 A descriptive analysis was carried out followed by analysis of association between size of the  
50 neighborhood scale and contextual features estimated by a multilevel ordinal logistic  
51 regression model. The first level consisted of the individual-level and the second consisted of  
52 the neighborhood-level variables.  
53  
54  
55

56 A regression model with random interceptors with a logit function were used to estimate the  
57  
58  
59

1  
2  
3 odds ratio (OR) and the confidence interval (CI 95%) [42]. The median values of the odds  
4 ratio (MOR) and the percentage of variance reduction were calculated. The Akaike  
5 Information Criterion (AIC) was used to compare models, selecting the best model as the one  
6 with lowest AIC [43].  
7  
8

9  
10 First, a null model (only the random intercept) was estimated to assess the contextual effect  
11 and then a univariate analysis was performed with a multilevel ordinal logistic regression for  
12 each of the contextual variables. Second, those independent domains with a coefficient that  
13 was significant at  $p \leq 0.20$  (aesthetic quality, walking environment, violence scale ad safety)  
14 in the univariate were included as level 2 variables in the multiple analysis. Finally, we added  
15 the individual characteristics (age, gender, employment status, number of parents and friend  
16 in the neighborhood, recognize people passing by the door of your house, residence length in  
17 the same neighborhood, presence of child younger than 10 and socioeconomic position) at  
18 level 1 for adjustment.  
19  
20  
21  
22  
23

24  
25 The analyses were performed in the software STATA (Stata Corp., College Station, Texas),  
26 version 12.0. For all analysis we used the svy command [44], that considers the complex  
27 design and sampling weights. For all models, we considered a significance level of 5%.  
28  
29

### 30 **Patient and Public Involvement**

31  
32 The research participants were selected in two regions of the city that show great internal  
33 heterogeneity in relation to sociodemographic characteristics. The local population was  
34 previously clarified about the objectives and importance of the research. After the selection of  
35 the participant's house, the objectives of the research and the selection criteria were clarified.  
36 The eligible participant was randomly chosen inside of each house. All participants signed a  
37 free and informed consent form. The results of the study were disseminated to the population  
38 and public policy administrators of the municipality.  
39  
40  
41  
42  
43  
44

### 45 **Ethical issues**

46  
47 The study was approved by the Research Ethics Committee of the UFMG through opinion  
48 ETIC n° 253/06. All participants signed informed consent.  
49  
50

### 51 **Results**

52  
53 The final sample had 4,048 respondents, 53.1% were men and 46.9% were women, with ages  
54 varying between 18 and 95 years (mean = 44.4, SD = 16.9). We found that 57.8% of the  
55 participants considered their neighborhood to be their own house until the end of the block,  
56  
57  
58  
59  
60



23.3% considered their neighborhood to be the 5 closest blocks, 7.4% the nearest 10 blocks to their residence and 11.5% considered their neighborhood to be larger than 10 blocks from their home (table 1).

There was a linear relationship between the size of the perceived neighborhood and the time to walk to his/her neighborhood end, with the following average times in minutes for each neighborhood size stratum: 6.1, 13.5, 19.8 and 29.2.

The distribution of street connectivity was almost the same with 39.7% of streets with connectivity between 0 and 3; 24.8% with value 4 and 35.4% with values between 5 to 9. The mean population density was 12,264 residents/km<sup>2</sup> (685.9). All these results are on table 2.

The multi-level model analysis began with the null model. The perceived neighborhood size had significant variation within census tract, given the likelihood-ratio test ( $p < 0.001$ ). The analysis showed the following scales and variables significantly associated with the self-perceived neighborhood size (table 3): walking environment (OR=2.96; CI 95%: 1.29 – 3.82), violence (OR=1.35; CI95%: 1.12 – 1.62), female gender (OR= 0.81; CI 95%: 0.68 – 0.96), greater number of relatives living in the neighborhood (OR= 4.63; CI 95%: 2.84 – 7.57), recognition of more people in the neighborhood (OR= 3.33; CI 95%: 1.72 – 6.25) and, socioeconomic position (NEI) (OR= 1.17; CI 95%: 1.06 – 1.29).

Based on the Akaike Information Criteria (AIC) the best models were adjusted by individual variables at level 1. The median value of the odds ratio comes from the median value between the area with highest odds of a larger perceived neighborhood scale and the area with lowest odds when randomly picking out two areas [42]. We found a MOR of 1.62 for the null model; 1.58 for the model with the contextual predictors and also 1.58 for the one adjusted by the individual variables. The results of proportional change in variance show that the contextual predictors explained 10.7% of the total variance and the model with contextual and individual variables explained 9.0%. Although the best model based on the AIC criterion is the context plus individual variables, the model only with contextual variables has more variation when compared to the null model. It means that 10.0% of the contextual variance of perceived neighborhood scale was attributed to the contextual factors and that when we added the individual level it decreased a little to 9.0% (table 3).

## Discussion

1  
2  
3 Perceived neighborhood scale was relatively small for many residents: 57.8% of the  
4 participants considered their neighborhood as residences closest to their home until the end of  
5 the block. Also, contextual factors such as perceived quality of environmental conditions for  
6 walking and indicators of a violent environment were associated with a larger perceived  
7 neighborhood scale, even adjusted by individual-level variables.  
8  
9

10  
11 These findings allow some comparison with previous studies, but care must be taken because  
12 each study has different approaches in measuring perceived neighborhood. A study carried  
13 out in the city of Los Angeles [45] reported that 35.1% of the interviewees considered their  
14 neighborhood to be a block or street that they live on, 25.0% several blocks or streets in each  
15 direction, 28.8% as an area within a 15-minute walk and 13.1% considered their  
16 neighborhood as an area larger than a 15-minute walk. In other words, 86.9% of participants  
17 considered their neighborhood as an area larger than 15-minute walk. This result is very  
18 similar to what we found, when we look to the average time taken to leave the self-perceived  
19 neighborhood within each stratum, 81.1% of participants considered their neighborhood as an  
20 area smaller than a 15-minute walk.  
21  
22

23  
24 Another study conducted in different areas of Seattle [25] found that 46.4% of participants  
25 considered their neighborhood as their own residential unit to no more than one block in each  
26 direction.  
27  
28

29  
30 However, studies using maps as an approach to measure the perceived neighborhood found  
31 much larger neighborhoods. A study [24] conducted in five Europe urban regions found a  
32 mean of 1.96 km<sup>2</sup>. Similar results were found in a small study conducted with adolescents in  
33 Boston, where it was reported a mean area of 1.82 km<sup>2</sup>. Stewart et al [46], found in a pilot  
34 study conducted in Auckland (New Zealand) an area of 3.54 km<sup>2</sup>; Coulton et al [21], in a  
35 study with 6,224 adults in low-income communities in 10 US cities found an area of 2.33  
36 km<sup>2</sup>. A study conducted in Helsinki and Espoo, Finland, with 15,982 persons, that calculated  
37 the area inside the most visited points in a neighborhood, found an average area of 1.07 km<sup>2</sup>  
38 [47].  
39  
40  
41  
42  
43  
44  
45  
46  
47

48  
49 Despite the heterogeneities in the sampling and methods utilized between studies, researches  
50 that use maps found larger neighborhoods, indicating a possible relationship to the  
51 methodology used to access the perceived neighborhood. A possible explanation is that it is  
52 easier to remember important points in neighborhoods when participants look at a map. Using  
53 an open- or closed-ended question does not provide that kind of specific context.  
54  
55  
56  
57  
58  
59  
60

1  
2  
3 The results of the multilevel model show us that there are contextual factors associated with  
4 perceived neighborhood domains. We found associations with the perceptions of the walking  
5 environment and with violence. The interpretation of the results of the scales should be done  
6 based on the analysis of the behavior of its domain [38]. The walking environment scale had  
7 highest values when the census tract had more people who reported that their neighborhoods  
8 have a physical environmental that encourage mobility and external activities. To our  
9 knowledge, the literature does not report a similar relationship, but it is plausible that an area  
10 that stimulates the mobility of people, facilitating diverse activities within the neighborhood  
11 could be also related with a large perception of neighborhood scale.  
12  
13  
14  
15  
16

17  
18 Violence scale, which reports higher values for more violent neighborhoods, was associated  
19 with larger perceived neighborhood scale. This appears contradictory at first glance, but  
20 people with larger perceived neighborhoods are likely to have greater social contact and  
21 exposure to the environment and may therefore be able to identify the problems within the  
22 neighborhood.  
23  
24  
25

26  
27 Regarding connectivity, we found an association between high street connectivity and larger  
28 perceived neighborhood scale only in a univariate analysis, despite a negative association  
29 found in another publication[21]. After adjustments, connectivity was no longer significant  
30 although the plausibility of the association; highly connected streets tend to be in busier  
31 places with a high demographic density and intense automobile traffic that hampers social  
32 contact and favors less extensive perceptions.  
33  
34  
35  
36

37 Demographic density was not associated with neighborhood perception. The literature  
38 consulted differs in relation to this variable. Some studies have found [21 23] association  
39 between smaller perceived neighborhood and greater population density. Others have reported  
40 an association between higher population densities and larger neighborhoods [24 48] and  
41 further one, such ours, found no relationship [26 45]. However, neighborhoods with a high  
42 population density, especially if car traffic is intense could also impoverished social contact  
43 among neighbors favoring a lower neighborhood perception, in the same direction of  
44 connectivity.  
45  
46  
47  
48  
49

50 This study has specific limitations that need to be mentioned as listed: 1. The use of a closed-  
51 ended question to obtain the perceived neighborhood scale does not specify the spaces that  
52 individuals are actually exposed to; 2. The cross-sectional design of the study limits the  
53 interpretation of some results, due to the possibility of reverse causality; 3. The results of this  
54  
55  
56  
57  
58  
59  
60

1  
2  
3 study are from a large urban center and are not necessarily valid for smaller cities and rural  
4 areas; 4. The findings may not apply to children since those younger than 18 years were not  
5 included in this study.  
6  
7

8 The identification of the contextual factors associated with the perception of neighborhood  
9 scale have important methodological implications, especially for studies that intend to  
10 investigate the association of social factors of the neighborhood with health events. The  
11 perceived neighborhood scale is a fundamental tool for the creation of more precise and  
12 coherent neighborhood boundaries informed by the places actually experienced by  
13 individuals.  
14  
15  
16  
17

18 One of the motivations of this study is related to the fact that a large amount of research in  
19 eco-epidemiology and community practice tends to use artificial definitions of neighborhoods  
20 boundaries. The results of this study demonstrate that there is heterogeneity among residents  
21 on their perceived neighborhood scale, reinforcing the argument that researchers need to use  
22 more personalized ways to define neighborhood boundaries. Most research uses census tracts  
23 as a proxy for neighborhoods due the availability of data aggregated to this level, but the  
24 increased use of GIS techniques supports more individualized neighborhood definitions that  
25 can be used to avoid problems regarding the choice of neighborhood size and its  
26 operationalization. A more carefully defined neighborhood unit will help future eco-  
27 epidemiological studies to produce evidence to support a community practices.  
28  
29  
30  
31  
32  
33  
34  
35  
36  
37  
38  
39  
40  
41  
42  
43  
44  
45  
46  
47  
48  
49  
50  
51  
52  
53  
54  
55  
56  
57  
58  
59  
60

**Contributors:**

**de Almeida Celio, Fabiano de Almeida:** Fabiano participated in the design of the study, its conception. Fabiano was responsible for writing the article and the following activities: He setting up the database, he made the statistical analysis, he reviewed the text, and approved the final version.

**Friche, Amélia Augusta de Lima:** Professor Friche participated in the design and construction of the field work; reviewed all versions of the work, ensured its accuracy and integrity and she approved the final version.

**Jennings, M. Zane:** Zane participated in design; ensured the accuracy and integrity of the data; approved all versions of the work and the final version.

**Andrade, Amanda Cristina de Souza:** Amanda participated in the design of the work, review all versions, statistical analysis, ensured the accuracy and precision of the data, approved the final version.

**Xavier, Cesar Coelho:** Professor Xavier participated in the design and construction of the field work; reviewed all versions of the work, ensured its accuracy and integrity and he approved the final version.

**Proietti, Fernando:** Professor Proietti participated in the design and construction of the field work; reviewed all versions of the work, ensured its accuracy and integrity and he approved the final version.

**Coulton, Claudia J.:** Professor Coulton participated in design; ensured the accuracy and integrity of the data; approved all versions of the work and the final version.

**Caiaffa, Waleska Teixeira:** Professor Caiaffa participated in the design and construction of the field work; reviewed all versions of the work, ensured its accuracy and integrity and she approved the final version.

**Competing Interests Declaration:**

All authors declare they have no actual or potential competing financial interest.

**Funding by:**

National Health Fund of the Ministry of Health, Fapemig, CNPq, NIH / Fogarty International Center.

**Data sharing:**

All relevant data are within the paper. The data underlying this study are third party data and are available to all interested researchers. To submit a proposal the OSUBH Coordinating Center at <http://site.medicina.ufmg.br/osubh/contato/>.

## References

1. Roux AVD. Health in cities: is a systems approach needed? *Cadernos de Saúde Pública* 2015;**31**:9-13
2. Cohen D, Spear S, Scribner R, et al. " Broken windows" and the risk of gonorrhoea. *American journal of public health* 2000;**90**(2):230
3. Schaefer-McDaniel N, Caughy MOB, O'Campo P, et al. Examining methodological details of neighbourhood observations and the relationship to health: a literature review. *Social science & medicine* 2010;**70**(2):277-92
4. Diez Roux AV, Mair C. Neighborhoods and health. *Annals of the New York Academy of Sciences* 2010;**1186**(1):125-45
5. Roux AVD, Merkin SS, Arnett D, et al. Neighborhood of residence and incidence of coronary heart disease. *New England Journal of Medicine* 2001;**345**(2):99-106
6. Mair CF, Roux AVD, Galea S. Are neighborhood characteristics associated with depressive symptoms? A critical review. *Journal of epidemiology and community health* 2008;jech. 2007.066605
7. Andrade ACdS, Peixoto SV, Friche AAdL, et al. Social context of neighborhood and socioeconomic status on leisure-time physical activity in a Brazilian urban center: The BH Health Study. *Cadernos de Saúde Pública* 2015;**31**:136-47
8. Fernandes AP, Andrade ACdS, Ramos CGC, et al. Leisure-time physical activity in the vicinity of Academias da Cidade Program in Belo Horizonte, Minas Gerais State, Brazil: the impact of a health promotion program on the community. *Cadernos de Saúde Pública* 2015;**31**:195-207
9. Chaix B, Kestens Y, Bean K, et al. Cohort Profile: Residential and non-residential environments, individual activity spaces and cardiovascular risk factors and diseases—The RECORD Cohort Study. *International Journal of Epidemiology* 2011;**107**:1-10
10. Ludwig J, Duncan GJ, Gennetian LA, et al. Neighborhood effects on the long-term well-being of low-income adults. *Science* 2012;**337**(6101):1505-10
11. Kaiser P, Diez Roux AV, Mujahid M, et al. Neighborhood environments and incident hypertension in the multi-ethnic study of atherosclerosis. *American journal of epidemiology* 2016;**183**(11):988-97
12. Johnson DA, Simonelli G, Moore K, et al. The neighborhood social environment and objective measures of sleep in the Multi-Ethnic Study of Atherosclerosis. *Sleep* 2017;**40**(1)
13. Chaix B, Merlo J, Evans D, et al. Neighbourhoods in eco-epidemiologic research: delimiting personal exposure areas. A response to Riva, Gauvin, Apparicio and Brodeur. *Social science & medicine* 2009;**69**(9):1306-10
14. Flowerdew R, Manley DJ, Sabel CE. Neighbourhood effects on health: does it matter where you draw the boundaries? *Social science & medicine* 2008;**66**(6):1241-55
15. Galster G. On the nature of neighbourhood. *Urban studies* 2001;**38**(12):2111-24
16. Santos SM, Chor D, Werneck GL. Demarcation of local neighborhoods to study relations between contextual factors and health. *International journal of health geographics* 2010;**9**(1):1
17. Clapp JM, Wang Y. Defining neighborhood boundaries: Are census tracts obsolete? *Journal of Urban Economics* 2006;**59**(2):259-84
18. Chaskin RJ. Perspectives on neighborhood and community: a review of the literature. *The Social Service Review* 1997:521-47
19. Chappell NL, Funk LM, Allan D. Defining community boundaries in health promotion

- research. *American Journal of Health Promotion* 2006;**21**(2):119-26
20. Chaix B, Meline J, Duncan S, et al. GPS tracking in neighborhood and health studies: a step forward for environmental exposure assessment, a step backward for causal inference? *Health & Place* 2013;**21**:46-51
21. Coulton C, Jennings MZ, Chan T. How Big is My Neighborhood? Individual and Contextual Effects on Perceptions of Neighborhood Scale. *American Journal of Community Psychology* 2012:1-11 doi: 10.1007/s10464-012-9550-6[published Online First: Epub Date]].
22. Coulton CJ, Korbin J, Chan T, et al. Mapping residents' perceptions of neighborhood boundaries: a methodological note. *American journal of community psychology* 2001;**29**(2):371-83
23. Haney W, Knowles E. Perception of neighborhoods by city and suburban residents. *Human Ecology* 1978;**6**(2):201-14 doi: 10.1007/bf00889095[published Online First: Epub Date]].
24. Charreire H, Feuillet T, Roda C, et al. Self-defined residential neighbourhoods: size variations and correlates across five European urban regions. *Obesity Reviews* 2016;**17**(S1):9-18
25. Guest AM, Lee BA. How urbanites define their neighborhoods. *Population and Environment* 1984;**7**(1):32-56
26. Pebley AR, Sastry N. Our place: perceived neighborhood size and names in Los Angeles. Los Angeles: California Center for Population Research, University of California 2009
27. Célio FdA, Xavier CC, Andrade ACdS, et al. Características individuais associadas à autopercepção da extensão territorial da vizinhança. *Cadernos de Saúde Pública* 2014;**30**:1935-46
28. Cutchin MP, Eschbach K, Mair CA, et al. The socio-spatial neighborhood estimation method: an approach to operationalizing the neighborhood concept. *Health & place* 2011;**17**(5):1113-21
29. Fotheringham AS, Wong DW. The modifiable areal unit problem in multivariate statistical analysis. *Environment and planning A* 1991;**23**(7):1025-44
30. Duncan DT, Kawachi I, Subramanian SV, et al. Examination of How Neighborhood Definition Influences Measurements of Youths' Access to Tobacco Retailers: A Methodological Note on Spatial Misclassification. *American Journal of Epidemiology* 2013 doi: 10.1093/aje/kwt251[published Online First: Epub Date]].
31. Sampson RJ, Morenoff JD, Gannon-Rowley T. Assessing "neighborhood effects": Social processes and new directions in research. *Annual review of sociology* 2002:443-78
32. Hillier B. Spatial sustainability in cities: organic patterns and sustainable forms. 2009
33. Andrade RGd, Chaves OC, Costa DAdS, et al. Overweight in men and women among urban area residents: individual factors and socioeconomic context. *Cadernos de Saúde Pública* 2015;**31**:148-58
34. Camargos VP, César CC, Caiaffa WT, et al. Imputação múltipla e análise de casos completos em modelos de regressão logística: uma avaliação prática do impacto das perdas em covariáveis. *Cad Saúde Pública* 2011;**27**:2299-313
35. Ferreira AD, César CC, Malta DC, et al. Validade de estimativas obtidas por inquérito telefônico: comparação entre VIGITEL 2008 e Inquérito Saúde em Beagá. *Rev Bras Epidemiol* 2011;**14**(1):16-30
36. Gerência de Epidemiologia e Informação Secretaria Municipal de Saúde de Belo Horizonte. Índice de vulnerabilidade à saúde. Secondary Índice de vulnerabilidade à saúde 2003. <http://www.pbh.gov.br/smsa/biblioteca/gabinete/risco2003>.
37. Friche AA, Xavier CC, Proietti FA, et al. *Saúde urbana em Belo Horizonte*. 1 ed, 2015.

- 1  
2  
3 38. Friche AA, Diez-Roux AV, Cesar CC, et al. Assessing the Psychometric and Ecometric  
4 Properties of Neighborhood Scales in. *Journal of urban health : bulletin of the New*  
5 *York Academy of Medicine* 2012 doi: 10.1007/s11524-012-9737-z[published Online  
6 First: Epub Date].
- 7 39. Song Y, Knaap G-J. Measuring urban form: Is Portland winning the war on sprawl?  
8 *Journal of the American Planning Association* 2004;**70**(2):210-25
- 9 40. Demográfico IC. Resultados do universo. Rio de Janeiro: IBGE 2010
- 10 41. Barros AJ, Victora CG. Indicador econômico para o Brasil baseado no censo demográfico  
11 de 2000. *Revista de Saúde Pública* 2005;**39**(4):523-29
- 12 42. Merlo J, Chaix B, Ohlsson H, et al. A brief conceptual tutorial of multilevel analysis in  
13 social epidemiology: using measures of clustering in multilevel logistic regression to  
14 investigate contextual phenomena. *J Epidemiol Community Health* 2006;**60**(4):290-7  
15 doi: 10.1136/jech.2004.029454[published Online First: Epub Date].
- 16 43. Twisk J. *Applied multilevel analysis: a practical guide*. 2006: Cambridge University  
17 Press, Cambridge, UK.
- 18 44. StataCorp L. *Stata survey data reference manual*, 1985.
- 19 45. Sastry N, Pebley AR, Zonta M. Neighborhood definitions and the spatial dimension of  
20 daily life in Los Angeles. California Center for Population Research 2002
- 21 46. Stewart T, Duncan S, Chaix B, et al. A novel assessment of adolescent mobility: a pilot  
22 study. *International journal of behavioral nutrition and physical activity* 2015;**12**(1):18
- 23 47. Hasanzadeh K, Broberg A, Kytä M. Where is my neighborhood? A dynamic individual-  
24 based definition of home ranges and implementation of multiple evaluation criteria.  
25 *Applied Geography* 2017;**84**:1-10
- 26 48. Vallée J, Le Roux G, Chaix B, et al. The 'constant size neighbourhood trap' in  
27 accessibility and health studies. *Urban Studies* 2014:0042098014528393
- 28  
29  
30  
31  
32  
33  
34  
35  
36  
37  
38  
39  
40  
41  
42  
43  
44  
45  
46  
47  
48  
49  
50  
51  
52  
53  
54  
55  
56  
57  
58  
59  
60



**Table 1.** Univariate analysis of individual variables by perceived neighborhood scale: percentages, means and standard deviations.

| INDIVIDUAL VARIABLES                                                         | Perceived Neighborhood scale (1-4 and %)* |              |              |              | OR (CI 95 %) <sup>1</sup> | p      |
|------------------------------------------------------------------------------|-------------------------------------------|--------------|--------------|--------------|---------------------------|--------|
|                                                                              | 1<br>(57.8%)                              | 2<br>(23.3%) | 3<br>(7.4%)  | 4<br>(11.5%) |                           |        |
| Gender (female)                                                              | 56.4                                      | 51.0         | 45.9         | 45.9         | 0,70 (0,58 – 0,83)        | <0.001 |
| Employment state (working)                                                   | 62.0                                      | 65.6         | 69           | 73.3         | 1.36 (1.14 - 1.61)        | <0.001 |
| Presence of child younger than 10 years (yes)                                | 33.1                                      | 31.5         | 30.6         | 33.0         | 0.95 (0.82 - 1.11)        | 0.540  |
| Number of relatives and friends living in the same neighborhood (almost all) | 2.92                                      | 7.07         | 7.83         | 13.03        | 6.30 (4.00 - 9.92)        | <0.001 |
| Recognizes most of them people passing by the door of his/her house (yes)    | 8.0                                       | 12.6         | 13.1         | 21.3         | 5.55 (3.04 - 10.11)       | <0.001 |
|                                                                              | Mean (Standard deviation)                 |              |              |              | OR (CI 95 %) <sup>1</sup> | p      |
| Age (years)                                                                  | 44.7 (0.35)                               | 44.9 (0.57)  | 41.1 (0.92)  | 43.2 (0.74)  | 0.99 (0.99 - 1.00)        | 0.060  |
| Socioeconomic position (NEI) **                                              | 586.8 (4.06)                              | 601.6 (6.6)  | 582.8 (11.4) | 601.4 (0.0)  | 1.13 (1.04 - 1.23)        | <0.001 |
| Time of residence in the same neighborhood (years)                           | 14.8 (0.26)                               | 16.8 (0.44)  | 16.2 (0.71)  | 16.6 (0.60)  | 1.01 (1.01 -1.02)         | <0.001 |

\* (1) up to the block or street you live on; (2) within 5 blocks; (3) within ten blocks; and (4) more than ten blocks away; OR – odds ratio; CI 95% – 95% confidence interval; NEI - national economic index; \*\* Odds ratio calculated based on an increase of 200 NEI points; <sup>1</sup> estimated by a multilevel ordinal logistic regression model, the reference category is the smaller neighborhood.

**Table 2.** Univariate analysis of contextual variables by perceived neighborhood scale: percentages, means and standard deviations.

| CONTEXTUAL VARIABLES                      | NEIGHBORHOOD EXTENSION SCALE (1-4 and %)* |                      |                      |                      | OR (CI 95 %) <sup>1</sup> | p      |
|-------------------------------------------|-------------------------------------------|----------------------|----------------------|----------------------|---------------------------|--------|
|                                           | 1<br>(57.8%)                              | 2<br>(23.3%)         | 3<br>(7.4%)          | 4<br>(11.5%)         |                           |        |
| Connectivity <sup>2</sup>                 |                                           |                      |                      |                      |                           |        |
| 0 to 3                                    | 39.91                                     | 40.91                | 41.87                | 40.37                | 1.00                      |        |
| 4                                         | 23.92                                     | 23.42                | 36.11                | 25.28                | 1.04 (0.83 - 1.30)        | 0.760  |
| 5 to 9                                    | 37.17                                     | 35.63                | 22.02                | 34.34                | 0.85 (0.70 - 1.04)        | 0.120  |
|                                           | Mean (Standard deviation)                 |                      |                      |                      | OR (CI 95 %) <sup>1</sup> | p      |
| Aesthetic Quality scale                   | 2.96 (0.03)                               | 3.07 (0.04)          | 3.06 (0.07)          | 3.09 (0.04)          | 1.23 (1.03 - 1.46)        | 0.020  |
| Walking Environment scale                 | 3.20 (0.01)                               | 3.24 (0.02)          | 3.27 (0.02)          | 3.28 (0.02)          | 3.37 (2.09 - 5.44)        | <0.001 |
| Violence scale                            | 1.90 (0.02)                               | 1.95 (0.03)          | 1.89 (0.05)          | 2.00 (0.04)          | 1.20 (1.03 - 1.40)        | 0.020  |
| Safety scale                              | 2.96 (0.03)                               | 2.93 (0.05)          | 2.89 (0.09)          | 2.86 (0.05)          | 0.92 (0.79 - 1.08)        | 0.190  |
| Population density (per square kilometer) | 12487.35<br>(791.26)                      | 11740.34<br>(704.83) | 12274.31<br>(740.63) | 12627.22<br>(865.05) | 1.00 (0.99 - 1.01)        | 0.650  |

\* (1) up to the block or street you live on; (2) within 5 blocks; (3) within ten blocks; and (4) more than ten blocks away; OR – odds ratio; CI 95% – 95% confidence interval. <sup>1</sup> estimated by a multilevel ordinal logistic regression model, the reference category is the smaller neighborhood; <sup>2</sup> 0 means poorly connected streets and 9 heavily connected streets.

**Table 3.** Multilevel ordinal logistic regression for the resident perceived neighborhood scale

| Variables                                                                    | Null Model | Contextual variables     |         | Contextual variables + individual variables |         |
|------------------------------------------------------------------------------|------------|--------------------------|---------|---------------------------------------------|---------|
|                                                                              |            | OR (CI 95%) <sup>1</sup> | p       | OR (CI 95%) <sup>1</sup>                    | p       |
| Aesthetic Quality scale                                                      |            | 1.21 (0.97 - 1.41)       | 0.060   | 1.13 (0.92 - 1.39)                          | 0.230   |
| Walking Environment scale                                                    |            | 2.96 (1.71 - 5.13)       | <0.001  | 2.22 (1.29 - 3.82)                          | <0.001  |
| Violence scale                                                               |            | 1.35 (1.12 - 1.62)       | <0.001  | 1.23 (1.01 - 1.51)                          | 0.040   |
| Safety scale                                                                 |            | 0.97 (0.82 - 1.14)       | 0.710   | 0.99 (0.83 - 1.19)                          | 0.950   |
| Connectivity <sup>2</sup>                                                    |            |                          |         |                                             |         |
| 4                                                                            |            | 1.00 (0.80 - 1.26)       | 0.940   | 1.06 (0.85 - 1.34)                          | 0.570   |
| 5 e 9                                                                        |            | 0.82 (0.67 - 1.01)       | 0.060   | 0.89 (0.72 - 1.11)                          | 0.310   |
| <b>INDIVIDUAL</b>                                                            |            |                          |         |                                             |         |
| Age (years)                                                                  |            |                          |         | 1.00 (0.99 - 1.00)                          | 0.350   |
| Gender (female)                                                              |            |                          |         | 0.81 (0.68 - 0.96)                          | 0.020   |
| Number of relatives and friends living in the same neighborhood (almost all) |            |                          |         | 4.63 (2.84 - 7.57)                          | <0.001  |
| Recognizes most of them people passing by the door of his/her house (yes)    |            |                          |         | 3.33 (1.72 - 6.25)                          | <0.001  |
| Employment state (working)                                                   |            |                          |         | 1.26 (1.06 - 1.50)                          | 0.010   |
| Time of residence in the same neighborhood (years)                           |            |                          |         | 1.01 (1.00 - 1.01)                          | 0.130   |
| Presence of child younger than 10 years old (yes)                            |            |                          |         | 0.97 (0.81 - 1.16)                          | 0.740   |
| Socioeconomic position**                                                     |            |                          |         | 1.17 (1.06 - 1.29)                          | <0.001  |
| <b>MODEL INFORMATION</b>                                                     |            |                          |         |                                             |         |
| Variance                                                                     | 0.2567     |                          | 0.2292  |                                             | 0.2336  |
| MOR                                                                          | 1.62       |                          | 1.58    |                                             | 1.58    |
| Proportional change in variance                                              | -          |                          | 10.71   |                                             | 9.00    |
| AIC                                                                          | 8749.26    |                          | 8668.44 |                                             | 8091.83 |

OR – odds ratio; CI 95% – 95% confidence interval; NEI - national economic index; MOR - median values of the odds ratio; AIC - Akaike Information Criterion; \*\* Odds ratio calculated based on an increase of 200 NEI points; <sup>1</sup> estimated by a multilevel ordinal logistic regression model, the reference category is the smaller neighborhood; <sup>2</sup> 0 means connected streets and 9 heavily connected streets.

1  
2  
3  
4  
5  
6 **Figure Legend:**  
7

8 Figure 1- Theoretical model for factors associated with perceived neighborhood scale  
9  
10  
11  
12  
13  
14  
15  
16  
17  
18  
19  
20  
21  
22  
23  
24  
25  
26  
27  
28  
29  
30  
31  
32  
33  
34  
35  
36  
37  
38  
39  
40  
41  
42  
43  
44  
45  
46  
47

For peer review only

1  
2  
3  
4  
5  
6  
7  
8  
9  
10  
11  
12  
13  
14  
15  
16  
17  
18  
19  
20  
21  
22  
23  
24  
25  
26  
27  
28  
29  
30  
31  
32  
33  
34  
35  
36  
37  
38  
39  
40  
41  
42  
43  
44  
45  
46  
47  
48  
49  
50  
51  
52  
53  
54  
55  
56  
57  
58  
59  
60

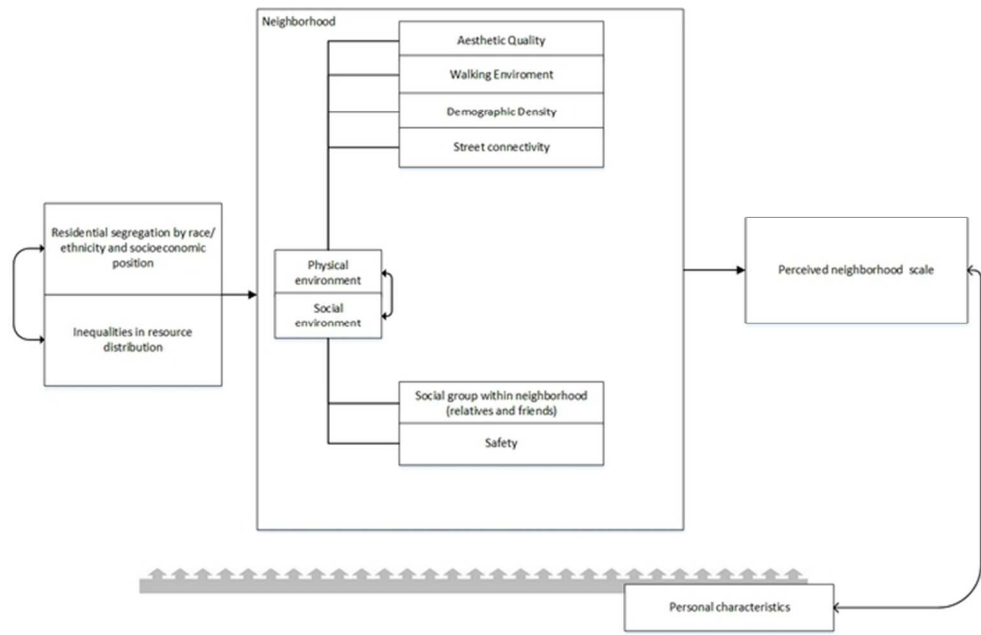

Theoretical Model for perceived neighborhood scale

30x19mm (600 x 600 DPI)

Review only

STROBE Statement—Checklist of items that should be included in reports of *cross-sectional studies*

|                              | Item No | Recommendation                                                                                                                                                                                    |                 |
|------------------------------|---------|---------------------------------------------------------------------------------------------------------------------------------------------------------------------------------------------------|-----------------|
| <b>Title and abstract</b>    | 1       | (a) Indicate the study's design with a commonly used term in the title or the abstract                                                                                                            | x               |
|                              |         | (b) Provide in the abstract an informative and balanced summary of what was done and what was found                                                                                               | x               |
| <b>Introduction</b>          |         |                                                                                                                                                                                                   |                 |
| Background/rationale         | 2       | Explain the scientific background and rationale for the investigation being reported                                                                                                              | x               |
| Objectives                   | 3       | State specific objectives, including any prespecified hypotheses                                                                                                                                  | x               |
| <b>Methods</b>               |         |                                                                                                                                                                                                   |                 |
| Study design                 | 4       | Present key elements of study design early in the paper                                                                                                                                           | x               |
| Setting                      | 5       | Describe the setting, locations, and relevant dates, including periods of recruitment, exposure, follow-up, and data collection                                                                   | x               |
| Participants                 | 6       | (a) Give the eligibility criteria, and the sources and methods of selection of participants                                                                                                       | x               |
| Variables                    | 7       | Clearly define all outcomes, exposures, predictors, potential confounders, and effect modifiers. Give diagnostic criteria, if applicable                                                          | x               |
| Data sources/<br>measurement | 8*      | For each variable of interest, give sources of data and details of methods of assessment (measurement). Describe comparability of assessment methods if there is more than one group              | Not applicable. |
| Bias                         | 9       | Describe any efforts to address potential sources of bias                                                                                                                                         | Not applicable. |
| Study size                   | 10      | Explain how the study size was arrived at                                                                                                                                                         | x               |
| Quantitative variables       | 11      | Explain how quantitative variables were handled in the analyses. If applicable, describe which groupings were chosen and why                                                                      | x               |
| Statistical methods          | 12      | (a) Describe all statistical methods, including those used to control for confounding                                                                                                             | X               |
|                              |         | (b) Describe any methods used to examine subgroups and interactions                                                                                                                               | Not applicable. |
|                              |         | (c) Explain how missing data were addressed                                                                                                                                                       | Not applicable. |
|                              |         | (d) If applicable, describe analytical methods taking account of sampling strategy                                                                                                                | x               |
|                              |         | (e) Describe any sensitivity analyses                                                                                                                                                             | Not applicable. |
| <b>Results</b>               |         |                                                                                                                                                                                                   |                 |
| Participants                 | 13*     | (a) Report numbers of individuals at each stage of study—eg numbers potentially eligible, examined for eligibility, confirmed eligible, included in the study, completing follow-up, and analysed | x               |
|                              |         | (b) Give reasons for non-participation at each stage                                                                                                                                              | Not applicable. |
|                              |         | (c) Consider use of a flow diagram                                                                                                                                                                | Not applicable. |
| Descriptive data             | 14*     | (a) Give characteristics of study participants (eg                                                                                                                                                | x               |

|                          |     |                                                                                                                                                                                                              |                 |
|--------------------------|-----|--------------------------------------------------------------------------------------------------------------------------------------------------------------------------------------------------------------|-----------------|
|                          |     | demographic, clinical, social) and information on exposures and potential confounders                                                                                                                        |                 |
|                          |     | (b) Indicate number of participants with missing data for each variable of interest                                                                                                                          | Not applicable. |
| Outcome data             | 15* | Report numbers of outcome events or summary measures                                                                                                                                                         | x               |
| Main results             | 16  | (a) Give unadjusted estimates and, if applicable, confounder-adjusted estimates and their precision (eg, 95% confidence interval). Make clear which confounders were adjusted for and why they were included | x               |
|                          |     | (b) Report category boundaries when continuous variables were categorized                                                                                                                                    | x               |
|                          |     | (c) If relevant, consider translating estimates of relative risk into absolute risk for a meaningful time period                                                                                             | Not applicable. |
| Other analyses           | 17  | Report other analyses done—eg analyses of subgroups and interactions, and sensitivity analyses                                                                                                               | Not applicable. |
| <b>Discussion</b>        |     |                                                                                                                                                                                                              |                 |
| Key results              | 18  | Summarise key results with reference to study objectives                                                                                                                                                     | x               |
| Limitations              | 19  | Discuss limitations of the study, taking into account sources of potential bias or imprecision. Discuss both direction and magnitude of any potential bias                                                   | x               |
| Interpretation           | 20  | Give a cautious overall interpretation of results considering objectives, limitations, multiplicity of analyses, results from similar studies, and other relevant evidence                                   | x               |
| Generalisability         | 21  | Discuss the generalisability (external validity) of the study results                                                                                                                                        | x               |
| <b>Other information</b> |     |                                                                                                                                                                                                              |                 |
| Funding                  | 22  | Give the source of funding and the role of the funders for the present study and, if applicable, for the original study on which the present article is based                                                | x               |

\*Give information separately for exposed and unexposed groups.

**Note:** An Explanation and Elaboration article discusses each checklist item and gives methodological background and published examples of transparent reporting. The STROBE checklist is best used in conjunction with this article (freely available on the Web sites of PLoS Medicine at <http://www.plosmedicine.org/>, Annals of Internal Medicine at <http://www.annals.org/>, and Epidemiology at <http://www.epidem.com/>). Information on the STROBE Initiative is available at [www.strobe-statement.org](http://www.strobe-statement.org).

# BMJ Open

## Contextual characteristics associated with the perceived neighborhood scale, in a cross-sectional study in a large urban center in Brazil

|                                 |                                                                                                                                                                                                                                                                                                                                                                                                                                                                                                                                                                                                                                                                                                                                                                  |
|---------------------------------|------------------------------------------------------------------------------------------------------------------------------------------------------------------------------------------------------------------------------------------------------------------------------------------------------------------------------------------------------------------------------------------------------------------------------------------------------------------------------------------------------------------------------------------------------------------------------------------------------------------------------------------------------------------------------------------------------------------------------------------------------------------|
| Journal:                        | <i>BMJ Open</i>                                                                                                                                                                                                                                                                                                                                                                                                                                                                                                                                                                                                                                                                                                                                                  |
| Manuscript ID                   | bmjopen-2017-021445.R2                                                                                                                                                                                                                                                                                                                                                                                                                                                                                                                                                                                                                                                                                                                                           |
| Article Type:                   | Research                                                                                                                                                                                                                                                                                                                                                                                                                                                                                                                                                                                                                                                                                                                                                         |
| Date Submitted by the Author:   | 13-Jun-2018                                                                                                                                                                                                                                                                                                                                                                                                                                                                                                                                                                                                                                                                                                                                                      |
| Complete List of Authors:       | de Almeida Celio, Fabiano; Universidade Federal de Minas Gerais, Public health<br>Friche, Amélia Augusta ; Universidade Federal de Minas Gerais Faculdade de Medicina, Public health<br>Jennings, M. Zane; Case Western Reserve University Jack Joseph and Morton Mandel School of Applied Social Sciences<br>Andrade, Amanda Cristina; Universidade Federal de Minas Gerais Faculdade de Medicina, public health<br>Xavier, Cesar ; faculdade de saúde e ecologia humana<br>Proietti, Fernando; Faculdade de Saúde e Ecologia Humana; Centro de Pesquisas Rene Rachou<br>Coulton, Claudia J.; Case Western Reserve University Jack Joseph and Morton Mandel School of Applied Social Sciences<br>Caiaffa, Waleska; Federal University of Minas Gerais, Medicine |
| <b>Primary Subject Heading</b>: | Epidemiology                                                                                                                                                                                                                                                                                                                                                                                                                                                                                                                                                                                                                                                                                                                                                     |
| Secondary Subject Heading:      | Public health                                                                                                                                                                                                                                                                                                                                                                                                                                                                                                                                                                                                                                                                                                                                                    |
| Keywords:                       | neighborhood, urban health, Perceived Neighborhood, neighborhood scale, Community perceptions                                                                                                                                                                                                                                                                                                                                                                                                                                                                                                                                                                                                                                                                    |
|                                 |                                                                                                                                                                                                                                                                                                                                                                                                                                                                                                                                                                                                                                                                                                                                                                  |

SCHOLARONE™  
Manuscripts



1  
2  
3 **Contextual characteristics associated with the perceived neighborhood scale, in a cross-**  
4 **sectional study in a large urban center in Brazil**

5  
6 **Corresponding author: Fabiano de Almeida Célio, [maitiz@gmail.com](mailto:maitiz@gmail.com), +55 31 99877 7761**  
7

8  
9 1) **Fabiano de Almeida Célio**<sup>1</sup>, [maitiz@gmail.com](mailto:maitiz@gmail.com); 2) **Amélia Augusta de Lima Friche**<sup>1</sup>,  
10 [gutafriche@gmail.com](mailto:gutafriche@gmail.com); 3) **M. Zane Jennings**<sup>2</sup>, [mzj@case.edu](mailto:mzj@case.edu); 4) **Amanda Cristina de**  
11 **Souza Andrade**<sup>1</sup>, [amandasouza\\_est@yahoo.com.br](mailto:amandasouza_est@yahoo.com.br); 5) **Cesar Coelho Xavier**<sup>3</sup>,  
12 [cesarcxavier@gmail.com](mailto:cesarcxavier@gmail.com); 6) **Fernando Augusto Proietti**<sup>3</sup>, [fernandoaproietti@gmail.com](mailto:fernandoaproietti@gmail.com); 7)  
13 **Claudia J. Coulton**<sup>2</sup>, [claudia.coulton@case.edu](mailto:claudia.coulton@case.edu); 8) **Waleska Teixeira Caiaffa**<sup>1</sup>,  
14 [caiaffa.waleska@gmail.com](mailto:caiaffa.waleska@gmail.com)  
15

16  
17 1. Observatory for Urban Health in Belo Horizonte, School of Medicine, Federal University  
18 of Minas Gerais, Belo Horizonte, Minas Gerais, Brazil

19 2. Case Western Reserve University Jack Joseph and Morton Mandel School of Applied  
20 Social Sciences, Cleveland OH, USA

21 3. Faculdade de Saúde e Ecologia Humana, Vespasiano, Minas Gerais, Brazil

22 4. Centro de Pesquisas René Rachou, Belo Horizonte, Minas Gerais, Brazil  
23

24 **Keywords:** neighbourhood, urban health; perceived neighbourhood; neighbourhood scale,  
25 community perceptions  
26

27 **Word count:** 3814  
28

29 **Reference count:** 47  
30

31  
32 **Abstract**  
33

34 **Introduction:** Health outcomes have been associated with physical and social characteristics  
35 of neighbourhoods, but little is known about the relationship between contextual factors and  
36 perceived neighbourhood scale. **Objective:** To identify the contextual factors associated with  
37 self-perceived neighbourhood scale. **Methods:** We analysed data from a cross-sectional  
38 population-based study in Belo Horizonte, Brazil, that took place in 2008-2009. The  
39 dependent variable was perceived neighbourhood, encoded as an ordinal scale based upon a  
40 brief description of the concept of the neighbourhood, and two independent scales relating  
41 distance, expressed in terms of geography and time. Street connectivity, demographic density  
42 and residents' perceptions of the neighbourhoods' physical and social environment were used  
43 as contextual predictors. Individual characteristics were used as covariates. Multilevel ordinal  
44 logistic regression models estimated the association between perceived neighbourhood scale  
45 and contextual characteristics. **Results:** Residents that perceive better walkability (OR=2.96;  
46 CI 95%: 1.29 - 3.82) and high amounts of violence (OR=1.35; CI 95%: 1.12 - 1.62) perceived  
47 their neighbourhoods to be larger, even after adjusting for individual characteristics.  
48  
49  
50  
51  
52  
53  
54  
55  
56  
57  
58  
59  
60

1  
2  
3 **Conclusion:** There are contextual factors that are associated with self-perceived  
4 neighbourhood scale. Careful definition of neighbourhood scale is a key factor in improving  
5 the results of eco-epidemiological studies. Although these findings must be further explored  
6 in other studies, these results can contribute to a better understanding of an appropriate choice  
7 of neighbourhood scale, especially for cities in Latin America.  
8  
9

### 10 11 **Summary Boxes:**

#### 12 13 **Strengths and limitations of this study:**

- 14 • Large sample comes from an urban centre in Latin America
- 15 • Analysis includes individual and contextual factors
- 16 • Neighbourhood definition can be obtained by closed-ended questions
- 17 • Analysis could identify contextual factors associated with perceived neighbourhood
- 18 • Analysis takes into account physical and social factors of the neighbourhood
- 19 scale
- 20
- 21
- 22
- 23
- 24
- 25
- 26
- 27
- 28
- 29
- 30
- 31
- 32
- 33
- 34
- 35
- 36
- 37
- 38
- 39
- 40
- 41
- 42
- 43
- 44
- 45
- 46
- 47
- 48
- 49
- 50
- 51
- 52
- 53
- 54
- 55
- 56
- 57
- 58
- 59
- 60

## Introduction

Eco-epidemiological research has increasingly used the concept of neighbourhood as the geographical area within which physical and social environmental features affect individuals' health outcomes, as part of an emphasis on a more holistic understanding of the factors and processes shaping health outcomes within urban areas [1].

Features in the neighbourhood help explain inequalities in health, can be used in studies aiming to evaluate community interventions intended to improve health outcomes [2-4], and have been shown to be predictive of health outcomes and health-affecting behaviours, such as cardiovascular diseases [5], sexually transmitted diseases [2], mental illness [6], and physical activity [7 8], among others [9-12].

However, the neighbourhood is a complex concept, and its definitions in epidemiological studies vary widely [13] and have different methodological approaches [14]. Chaix et al (2009) describe two approaches for defining neighbourhood in epidemiological research: the territorial neighbourhood and the ego-centred neighbourhood approaches.

*Territorial neighbourhoods* are generally administrative areas corresponding to a territory-subdividing approach. However, more complex definitions of territorial neighbourhoods may consider built environment features and population characteristics. Researchers using this approach often select administratively defined, mutually exclusive geographic units, such as census tracts or municipal boundaries, as proxies for neighbourhoods [13 15]. Assuming resident homogeneity [16 17], this approach is adopted because secondary data is often easily available and spatial references are obtainable, which facilitates reproducibility and comparability across studies or over time. However, territorial neighbourhoods consider the same areas for different individuals, and thus, individual differences in neighbourhood experience and exposure cannot be captured under this approach [16 17]. When the same area is attributed to several individuals in a given area, the potential for error is introduced because individuals may not be exposed in a homogeneous way to the physical and social environment of the territory.

The second approach is called ego-centred neighbourhoods and is based upon the idea that the contextual factors affecting individuals will differ depending on the actual location and particular geographic circumstances of those individuals. Several techniques can be used to define this approach. Most importantly, the ego-centred neighbourhood results in neighbourhoods that may overlap, are not mutually exclusive, and are specific to the

1  
2  
3 household or individual resident [13]. This approach can be operationalized in three different  
4 ways. One uses a buffer, generally a circular area centred upon the individual's residence,  
5 resulting in neighbourhoods of the same size, though made up of different areas, that may  
6 overlap with one another but are not identical. The second approach involves using individual  
7 behavioural activity spaces measured by GPS. This approach captures each individual's  
8 movements and activities, creating a unique measure of contextual exposure [9 18]. The third  
9 method relies on individuals' perceived neighbourhoods.  
10  
11  
12  
13

14 Perceived neighbourhoods, in turn, can be identified by different strategies. Residents may be  
15 asked to identify or draw their neighbourhood on a map [19-22], or, alternatively, researchers  
16 may ask residents how large they consider their neighbourhood to be or how long it takes to  
17 walk from the resident's house to the end of their neighbourhood [13 23-25]. This last  
18 technique has the advantage of being easily understood by residents and quickly and  
19 inexpensively conducted by researchers.  
20  
21  
22  
23

24 Regardless of the methods, neighbourhood scale needs to be carefully considered. When it is  
25 not correctly operationalized and defined, the measures derived can be considered  
26 problematic and questionable. Consequently, the understanding of health impacts through the  
27 lens of the neighbourhood can be undermined [26]. One problem that may arise is known in  
28 geography as the [27] "modifiable area unit problem". Aggregating epidemiological data into  
29 differently sized territorial units can yield varying exposure measure results, making it  
30 difficult or even impossible to compare findings. Generally, the error of choice of territorial  
31 unit of analysis is non-differential, which may underestimate association measures or even not  
32 find associations when they do exist [28].  
33  
34  
35  
36  
37  
38  
39

40 The attributes that make the neighbourhood of an individual a singular place are commonly  
41 characterized by the following qualities: a) social interaction; b) social norms and collective  
42 effectiveness; c) institutional resources (schools, health facilities and others); and d) routine  
43 activities within the neighbourhood. As we can see, it is difficult not to incur some kind of  
44 neighbourhood boundary definition error when the internal dynamics of the place under study  
45 are unknown [29].  
46  
47  
48  
49

50 Perceived neighbourhood scale has been found to be related to individual characteristics, such  
51 as socioeconomic position, employment, evaluation of the aesthetic aspects, number of  
52 relatives living in the same neighbourhood and familiarity with many people in the  
53 neighbourhood [25]. However, the scale of perceived neighbourhood can be influenced by  
54  
55  
56  
57  
58  
59  
60

1  
2  
3 contextual factors such as population density, land use patterns, and collective efficacy [19].  
4 The connectivity of the streets that directly influence the number of routes available to the  
5 various points of interest within a neighbourhood can also influence the perception of its size,  
6 because connectivity may change the way residents use and circulate in physical space [30].  
7  
8

9  
10 This work, by investigating perceived neighbourhood scale, addresses an important  
11 methodological question, which concerns the appropriate scale of territorial units of analysis,  
12 reducing possible errors inherent to the process of investigating neighbourhood impact on  
13 health outcomes. Despite research results indicating a relationship between neighbourhood  
14 and health, it is still rare to find studies that measure the influence of contextual factors as  
15 shaped by perceived neighbourhood scale. In Latin America, we have not found any studies  
16 with this same purpose. Therefore, the objective of this study is to analyse the context  
17 attributes associated with the perceived neighbourhood scale in a large urban centre in Brazil.  
18  
19  
20  
21  
22

## 23 **Methods**

### 24 **Data and Sample**

25  
26 The data for this study come from a cross-sectional population-based study called *BH Health*  
27 *Study*, conducted by the Belo Horizonte Observatory for Urban Health (OSUBH) in 2008-  
28 2009 and nested in the Federal University of Minas Gerais (UFMG). The participants of the  
29 study were residents belonging to two of the nine sanitary districts of Belo Horizonte:  
30 Barreiro and West. These districts were selected because they presented heterogeneity within  
31 the city in relation to social, sociodemographic and health indicators [31-33].  
32  
33  
34  
35  
36  
37

38 A stratified sample was selected in a three-stage process. To ensure the representation of  
39 residents of all socioeconomic levels, the study area was stratified by the health vulnerability  
40 index [34], a geocoded index created by combining social, demographic, economic, and  
41 health indicators from different sources for each census tract. At the end of the first and  
42 second steps of the sampling process, 149 census tracts and 4,048 households were randomly  
43 selected. In the third stage, one resident over 18 years old was randomly selected in each of  
44 the identified households [35].  
45  
46  
47  
48  
49

### 50 **Contextual predictors**

51  
52 The dependent variable for this study is the perceived neighbourhood scale, which was  
53 originally encoded as an ordinal variable with 7 options. To obtain the scale, the interviewer  
54 read a brief description of the concept of the neighbourhood: "The neighbourhood is the place  
55  
56  
57  
58  
59  
60

1  
2  
3 where you live and perform routine tasks, such as going to the bakery, grocery store, and local  
4 businesses; visiting your neighbours; and walking. The neighbourhood can be understood as  
5 the area where you recognize most of the people". Then, the interviewee was asked,  
6 "Thinking of your neighbourhood, would you describe it as including the following: (1) the  
7 houses next door? (2) the block or street you live on? (3) the area within 5 blocks? (4) the area  
8 within ten blocks? (5) the area more than ten blocks away? (6) your neighbourhood? (7) your  
9 neighbourhood and nearby neighbourhoods?" Subsequently, this variable was recoded, using  
10 as reference an additional measure of neighbourhood scale. This measure was a continuous  
11 variable obtained from the following question: "How much time in minutes would you spend  
12 walking from the door of your house to the end of what you consider your neighbourhood?"  
13 The mean walking time obtained for each of the seven options of the first ordinal question  
14 variable was used to collapse the final dependent variable into four options. This procedure  
15 was adopted by considering the non-overlapping portion of the 95% confidence intervals  
16 (95% CI) between each stratum. Thus, the outcome variable called the perceived  
17 neighbourhood scale was recoded into four categories: (1) up to the block or street you live  
18 on; (2) within 5 blocks; (3) within ten blocks; and (4) more than ten blocks away.

### 29 **Independent variables**

31 The independent variables were chosen based on the theoretical (Figure 1) model using other  
32 studies [4 25]. The variables relating to the physical and social environment of the  
33 neighbourhood were obtained from domains created by Friche et al [36]. Aggregated for each  
34 census tract, the domains provide a continuous score ranging from 1 to 4. In this study, we  
35 used the following domains: aesthetic quality, walking environment, safety and violence.

39 The aesthetic quality domain was obtained by asking the participants the following questions  
40 about their neighbourhood: 1) Is there trash or litter on the streets and sidewalks? 2) Is  
41 pleasant for children? 3) Is pleasant for young children and adolescents? 4) Are there trees  
42 that make the environment pleasant?

46 The walking environment domain was obtained by asking the participants the following about  
47 their neighbourhood: 1) How do you evaluate public places for sports and leisure? 2) How do  
48 you evaluate the traffic? 3) Are there stores at a distance you can walk? 4) Is it easy to walk?  
49 5) How often do you see other people walking? 6. How often do you see other people  
50 exercising? 7) Do you feel safe walking during the day?

56 The violence domain was composed of the following questions: During the past 12 months,

1  
2  
3 did you see or hear about the following: 1) people being mugged in the neighbourhood  
4 streets? 2) people fighting using weapons? 3) people being killed by guns? 4) people being  
5 victims of sexual violence? 5) women of the neighbourhood being beaten by their husbands  
6 and/or partners or relatives? and 6) children or adolescents of the neighbourhood being  
7 assaulted or victims of violence perpetrated by their parents?  
8  
9

10  
11 The safety domain was built with the following questions: In your neighbourhood, 1) you feel  
12 safe walking during the night; 2) violence is a problem.  
13  
14

15 This study also used contextual variables from census tracts and those collected by the city  
16 hall for administrative purposes. Street connectivity drawn from all street segments of the area  
17 in the study was obtained using Dephmap [37] (Space Syntax Ltd. University of London)  
18 software. This software handles the street segment as if it were an axial line and quantifies the  
19 segments that intersect each of these lines [30]. The software delivers a score between 0 and  
20 9, where 0 represents streets with low connectivity and 9 represents highly connected streets  
21 [38]. The final variable was skewed, with a low prevalence of extreme values, so it was  
22 recoded into three categories: low connectivity (0 to 3); medium connectivity (4), and high  
23 connectivity (5 to 9).  
24  
25  
26  
27  
28  
29

30 Population density was calculated for each census tract using data from the 2010 National  
31 Census [39].  
32  
33

### 34 **Individual variables**

35  
36 Individual characteristics were included as covariates that had been found to be predictors of  
37 neighbourhood scale in previous studies [19 25]. These characteristics included the following:  
38 gender; age (in years); employment status; length of residence in home (in years); presence of  
39 children under 10 years of age in the household; number of relatives in the same  
40 neighbourhood (none to all); number of people who pass in front of participants' houses who  
41 are known to them (none to all); and a composite indicator named the national economic  
42 index (NEI), which depicts the current socioeconomic position of the individual [40], based  
43 upon consumer goods instead of income.  
44  
45  
46  
47  
48  
49

### 50 **Statistical analyses**

51  
52 A descriptive analysis was carried out, followed by an analysis of the association between  
53 size of the neighbourhood scale and contextual features estimated by a multilevel ordinal  
54 logistic regression model. The first level consisted of the individual-level variables, and the  
55  
56  
57  
58  
59

1  
2  
3 second level consisted of the neighbourhood-level variables.

4  
5 A regression model with random intercepts with a logit function were used to estimate the  
6 odds ratio (OR) and the confidence interval (CI 95%) [41]. The median values of the odds  
7 ratio (MOR) and the percentage of variance reduction were calculated. The Akaike  
8 information criterion (AIC) was used to compare models, with the model with the lowest AIC  
9 selected as the best model [42].  
10  
11  
12

13  
14 First, a null model (only the random intercept) was estimated to assess the contextual effect,  
15 and then a univariate analysis was performed with a multilevel ordinal logistic regression for  
16 each of the contextual variables. Second, independent domains with a coefficient that was  
17 significant at  $p \leq 0.20$  (aesthetic quality, walking environment, violence domain and safety) in  
18 the univariate analysis were included as level 2 variables in the multiple analysis. Finally, we  
19 added the individual characteristics (age, gender, employment status, number of parents and  
20 friends in the neighbourhood, recognition of people passing by the door of your house, length  
21 of residence in the same neighbourhood, presence of children younger than 10 and  
22 socioeconomic position) at level 1 for adjustment.  
23  
24  
25  
26  
27  
28

29 The analyses were performed in the software STATA (Stata Corp., College Station, Texas),  
30 version 12.0. For all analyses, we used the svy command [43], which considers complex  
31 design and sampling weights. For all models, we considered a significance level of 5%.  
32  
33

### 34 **Patient and Public Involvement**

35  
36 The research participants were selected in two regions of the city that show great internal  
37 heterogeneity in relation to sociodemographic characteristics. The local population was  
38 previously informed about the objectives and importance of the research through several  
39 approaches, including the involvement of community leader representatives, religious groups,  
40 school educators, and health agents of family and community health programmes. After the  
41 selection of the households, the objectives of the research were presented to each participant.  
42 The results of the study were thoroughly disseminated within the population and discussed  
43 with public policy administrators of the municipality.  
44  
45  
46  
47  
48  
49

### 50 **Ethical issues**

51  
52 The study was approved by the Research Ethics Committee of the UFMG through opinion  
53 ETIC n° 253/06. All participants provided informed consent.  
54  
55

### 56 **Results**



1  
2  
3 The final sample had 4,048 respondents, 53.1% of whom were men and 46.9% of whom were  
4 women, with ages varying between 18 and 95 years (mean = 44.4 , SD = 16.9). We found that  
5 57.8% of the participants considered their neighbourhood to extend from their own house to  
6 the end of the block, 23.3% considered their neighbourhood to be within the 5 closest blocks,  
7 7.4% considered their neighbourhood to be within the nearest 10 blocks, and 11.5%  
8 considered their neighbourhood to be larger than 10 blocks from their home (table 1).  
9  
10  
11

12  
13 There was a linear relationship between the size of the perceived neighbourhood and the time  
14 to walk to his/her end of the neighbourhood, with the following average times, in minutes, for  
15 each neighbourhood size stratum: 6.1, 13.5, 19.8 and 29.2.  
16  
17

18 The distribution of street connectivity was almost the same, with 39.7% of streets with  
19 connectivity between 0 and 3; 24.8% with a value of 4; and 35.4% with values between 5 and  
20 9. The mean population density was 12,264 residents/km<sup>2</sup> (685.9). All of these results are  
21 shown in table 2.  
22  
23  
24

25 The multilevel model analysis began with the null model. The perceived neighbourhood size  
26 had significant variation within the census tract, based on the likelihood-ratio test ( $p < 0.001$ ).  
27 The analysis showed that the following domains and variables were significantly associated  
28 with self-perceived neighbourhood size (table 3): walking environment (OR=2.96; CI 95%:  
29 1.29 – 3.82), violence (OR=1.35; CI95%: 1.12 – 1.62), female gender (OR= 0.81; CI 95%:  
30 0.68 – 0.96), greater number of relatives living in the neighbourhood (OR= 4.63; CI 95%:  
31 2.84 – 7.57), recognition of more people in the neighbourhood (OR= 3.33; CI 95%: 1.72 –  
32 6.25), and socioeconomic position (NEI) (OR= 1.17; CI 95%: 1.06 – 1.29).  
33  
34  
35  
36  
37  
38

39 Based on the Akaike information criterion (AIC), the best models were adjusted by individual  
40 variables at level 1. The median value of the odds ratio comes from the median value between  
41 the area with the highest odds of a larger perceived neighbourhood scale and the area with the  
42 lowest odds when randomly selecting two areas [41]. We found an MOR of 1.62 for the null  
43 model, 1.58 for the model with the contextual predictors, and 1.58 for the model adjusted by  
44 the individual variables. The results of the proportional change in variance show that the  
45 contextual predictors explained 10.7% of the total variance, and the model with contextual  
46 and individual variables explained 9.0%. Although the best model based on the AIC is the  
47 model with contextual and individual variables, the model with only contextual variables has  
48 more variation than the null model. This finding indicates that 10.0% of the contextual  
49 variance of perceived neighbourhood scale was attributed to the contextual factors and that  
50  
51  
52  
53  
54  
55  
56  
57  
58  
59  
60

1  
2  
3 when we added the individual-level variables, it decreased slightly to 9.0% (table 3).  
4

## 5 **Discussion**

6  
7 Perceived neighbourhood scale was relatively small for many residents: 57.8% of the  
8 participants considered their neighbourhood to be residences closest to their home until the  
9 end of the block. Additionally, contextual factors, such as perceived quality of environmental  
10 conditions for walking and indicators of a violent environment, were associated with a larger  
11 perceived neighbourhood scale, even adjusted by individual-level variables.  
12  
13  
14

15  
16 These findings allow for comparison with those of previous studies, but care must be taken  
17 because each study has different approaches in measuring perceived neighbourhood. A study  
18 carried out in the city of Los Angeles [44] reported that 35.1% of the interviewees considered  
19 their neighbourhood the block or street that they live on, 25.0% several blocks or streets in  
20 each direction, 28.8% an area within a 15-minute walk, and 13.1% an area larger than a 15-  
21 minute walk. In other words, 86.9% of participants considered their neighbourhood an area  
22 larger than a 15-minute walk. This result is very similar to what we found; when we look at  
23 the average time taken to leave the self-perceived neighbourhood within each stratum, 81.1%  
24 of participants considered their neighbourhood an area smaller than a 15-minute walk.  
25  
26  
27  
28  
29

30  
31 Another study conducted in different areas of Seattle [23] found that 46.4% of participants  
32 considered their neighbourhood to extend from their own residential unit to no more than one  
33 block in each direction.  
34  
35

36  
37 However, studies using maps as an approach to measure the perceived neighbourhood found  
38 much larger neighbourhoods. A study [22] conducted in five European urban regions found a  
39 mean perceived neighbourhood of 1.96 km<sup>2</sup>. Similar results were found in a small study  
40 conducted with adolescents in Boston, where a mean area of 1.82 km<sup>2</sup> was reported. In a pilot  
41 study conducted in Auckland (New Zealand), Stewart et al [45] found a perceived  
42 neighbourhood area of 3.54 km<sup>2</sup>; in a study with 6,224 adults in low-income communities in  
43 10 US cities, Coulton et al [19] found an area of 2.33 km<sup>2</sup>. A study conducted with 15,982  
44 persons, in Helsinki and Espoo, Finland, that calculated the area inside the most visited points  
45 in a neighbourhood, found an average area of 1.07 km<sup>2</sup> [46].  
46  
47  
48  
49  
50

51  
52 Despite the heterogeneities in the sampling and methods utilized among studies, studies that  
53 used maps found larger neighbourhoods, indicating a possible relationship with the  
54 methodology used to access the perceived neighbourhood. A possible explanation is that it is  
55  
56  
57  
58  
59  
60

1  
2  
3 easier to remember important points in neighbourhoods when participants look at a map.  
4 Using an open- or closed-ended question does not provide that kind of specific context.  
5

6  
7 The results of the multilevel model show us that there are contextual factors associated with  
8 perceived neighbourhood domains. We found associations with the perceptions of the walking  
9 environment and with violence. The interpretation of the results of the scales should be  
10 performed based on the analysis of the behaviour of its domain [36]. The walking  
11 environment scale had highest values when the census tract had more people who reported  
12 that their neighbourhoods have a physical environment that encourages mobility and external  
13 activities. To our knowledge, the literature does not report a similar relationship, but it is  
14 plausible that an area that stimulates the mobility of people, facilitating diverse activities  
15 within the neighbourhood, could also be related to a large perceived neighbourhood scale.  
16  
17

18  
19 The violence domain, which reports higher values for more violent neighbourhoods, was  
20 associated with larger perceived neighbourhood scale. This finding appears to be  
21 contradictory at first glance, but people with larger perceived neighbourhoods are likely to  
22 have greater social contact and exposure to the environment and may therefore be able to  
23 identify the problems within the neighbourhood.  
24  
25

26  
27 Regarding connectivity, we found an association between high street connectivity and larger  
28 perceived neighbourhood scale only in a univariate analysis, despite a negative association  
29 found in another publication[19]. After adjustments, connectivity was no longer significant,  
30 although the plausibility of the association remains; highly connected streets tend to be  
31 located in busier places with a high demographic density and intense automobile traffic,  
32 which hampers social contact and favours less extensive perceptions.  
33  
34

35  
36 Demographic density was not associated with neighbourhood perception. The literature  
37 consulted differs in relation to this variable. Some studies have found [19 21] an association  
38 between smaller perceived neighbourhood and greater population density. Others have  
39 reported an association between higher population densities and larger neighbourhoods [22  
40 47], and yet other studies, such ours, have found no relationship [24 44]. However,  
41 neighbourhoods with a high population density, especially if car traffic is intense, could also  
42 have impoverished social contact among neighbours, favouring a lower neighbourhood  
43 perception, in the same direction of connectivity.  
44  
45

46  
47 This study has specific limitations that need to be mentioned. First, the use of a closed-ended  
48 question to obtain the perceived neighbourhood scale does not specify the spaces to which  
49  
50  
51  
52  
53  
54  
55  
56  
57  
58  
59  
60

1  
2  
3 individuals are actually exposed. Second, the cross-sectional design of the study limits the  
4 interpretation of some results due to the possibility of reverse causality. Third, the results of  
5 this study are from a large urban centre and are not necessarily valid for smaller cities and  
6 rural areas. Fourth, the findings may not apply to children, since individuals younger than 18  
7 years were not included in this study.  
8  
9

10  
11 The identification of the contextual factors associated with the perception of neighbourhood  
12 scale have important methodological implications, especially for studies that intend to  
13 investigate the association between social factors of the neighbourhood and health events. The  
14 perceived neighbourhood scale is a fundamental tool for the creation of more precise and  
15 coherent neighbourhood boundaries informed by the places actually experienced by  
16 individuals.  
17  
18  
19  
20

21  
22 One of the motivations of this study is related to the fact that a large amount of research in  
23 eco-epidemiology and community practice tends to use artificial definitions of  
24 neighbourhoods' boundaries. The results of this study demonstrate that there is heterogeneity  
25 among residents on their perceived neighbourhood scale, reinforcing the argument that  
26 researchers need to use more personalized ways to define neighbourhood boundaries. Most  
27 research uses census tracts as a proxy for neighbourhoods due to the availability of data  
28 aggregated at this level, but the increased use of GIS techniques supports more individualized  
29 neighbourhood definitions that can be used to avoid problems regarding the choice of  
30 neighbourhood size and its operationalization. A more carefully defined neighbourhood unit  
31 will help future eco-epidemiological studies to produce evidence to support community  
32 practices.  
33  
34  
35  
36  
37  
38  
39  
40  
41  
42  
43  
44  
45  
46  
47  
48  
49  
50  
51  
52  
53  
54  
55  
56  
57  
58  
59  
60

**Contributors:**

**de Almeida Celio, Fabiano de Almeida:** Fabiano participated in the design of the study and its conception. Fabiano was responsible for writing the article and the following activities: setting up the database, performing the statistical analysis, reviewing the text and approving the final version.

**Friche, Amélia Augusta de Lima:** Professor Friche participated in the design of the field work, reviewed all versions of the paper, ensured its accuracy and integrity and approved the final version.

**Jennings, M. Zane:** Zane participated in design, ensured the accuracy and integrity of the data, and approved the versions of the paper and the final version.

**Andrade, Amanda Cristina de Souza:** Amanda participated in the design of the work, reviewed all versions, performed the statistical analysis, ensured the accuracy and precision of the data, and approved the final version of the paper.

**Xavier, Cesar Coelho:** Professor Xavier participated in the design of the field work and approved the final version of the paper.

**Proietti, Fernando:** Professor Proietti participated in the design of the field work and approved the final version of the paper.

**Coulton, Claudia J:** Professor Coulton participated in the analysis of the paper and approved the final version.

**Caiaffa, Waleska Teixeira:** Professor Caiaffa participated in the design and construction of the field work, reviewed all versions of the paper, ensured its accuracy and integrity and approved the final version.

**Competing Interests Declaration:**

All authors declare that they have no actual or potential competing financial interest.

**Funding by:**

National Health Fund of the Ministry of Health, Fapemig, CNPq, NIH/Fogarty International Centre.

**Data sharing:**

All relevant data are within the paper. The data underlying this study are third-party data and are available to all interested researchers. To gain access to these data, please submit a proposal the OSUBH Coordinating Centre at <http://site.medicina.ufmg.br/osubh/contato/>.

## References

1. Roux AVD. Health in cities: is a systems approach needed? *Cadernos de Saúde Pública* 2015;**31**:9-13
2. Cohen D, Spear S, Scribner R, et al. " Broken windows" and the risk of gonorrhoea. *American journal of public health* 2000;**90**(2):230
3. Schaefer-McDaniel N, Caughy MOB, O'Campo P, et al. Examining methodological details of neighbourhood observations and the relationship to health: a literature review. *Social science & medicine* 2010;**70**(2):277-92
4. Diez Roux AV, Mair C. Neighborhoods and health. *Annals of the New York Academy of Sciences* 2010;**1186**(1):125-45
5. Roux AVD, Merkin SS, Arnett D, et al. Neighborhood of residence and incidence of coronary heart disease. *New England Journal of Medicine* 2001;**345**(2):99-106
6. Mair CF, Roux AVD, Galea S. Are neighborhood characteristics associated with depressive symptoms? A critical review. *Journal of epidemiology and community health* 2008:jech.2007.066605
7. Andrade ACdS, Peixoto SV, Friche AAdL, et al. Social context of neighborhood and socioeconomic status on leisure-time physical activity in a Brazilian urban center: The BH Health Study. *Cadernos de Saúde Pública* 2015;**31**:136-47
8. Fernandes AP, Andrade ACdS, Ramos CGC, et al. Leisure-time physical activity in the vicinity of Academias da Cidade Program in Belo Horizonte, Minas Gerais State, Brazil: the impact of a health promotion program on the community. *Cadernos de Saúde Pública* 2015;**31**:195-207
9. Chaix B, Kestens Y, Bean K, et al. Cohort Profile: Residential and non-residential environments, individual activity spaces and cardiovascular risk factors and diseases—The RECORD Cohort Study. *International Journal of Epidemiology* 2011;**107**:1-10
10. Ludwig J, Duncan GJ, Gennetian LA, et al. Neighborhood effects on the long-term well-being of low-income adults. *Science* 2012;**337**(6101):1505-10
11. Kaiser P, Diez Roux AV, Mujahid M, et al. Neighborhood environments and incident hypertension in the multi-ethnic study of atherosclerosis. *American journal of epidemiology* 2016;**183**(11):988-97
12. Johnson DA, Simonelli G, Moore K, et al. The neighborhood social environment and objective measures of sleep in the Multi-Ethnic Study of Atherosclerosis. *Sleep* 2017;**40**(1)
13. Chaix B, Merlo J, Evans D, et al. Neighbourhoods in eco-epidemiologic research: delimiting personal exposure areas. A response to Riva, Gauvin, Apparicio and Brodeur. *Social science & medicine* 2009;**69**(9):1306-10
14. Flowerdew R, Manley DJ, Sabel CE. Neighbourhood effects on health: does it matter where you draw the boundaries? *Social science & medicine* 2008;**66**(6):1241-55
15. Galster G. On the nature of neighbourhood. *Urban studies* 2001;**38**(12):2111-24
16. Chaskin RJ. Perspectives on neighborhood and community: a review of the literature. *The Social Service Review* 1997:521-47
17. Chappell NL, Funk LM, Allan D. Defining community boundaries in health promotion research. *American Journal of Health Promotion* 2006;**21**(2):119-26
18. Chaix B, Meline J, Duncan S, et al. GPS tracking in neighborhood and health studies: a step forward for environmental exposure assessment, a step backward for causal inference? *Health & Place* 2013;**21**:46-51
19. Coulton C, Jennings MZ, Chan T. How Big is My Neighborhood? Individual and Contextual Effects on Perceptions of Neighborhood Scale. *American Journal of Community Psychology* 2012:1-11 doi: 10.1007/s10464-012-9550-6[published Online First: Epub Date]].
20. Coulton CJ, Korbin J, Chan T, et al. Mapping residents' perceptions of neighborhood boundaries: a methodological note. *American journal of community psychology* 2001;**29**(2):371-83

21. Haney W, Knowles E. Perception of neighborhoods by city and suburban residents. *Human Ecology* 1978;**6**(2):201-14 doi: 10.1007/bf00889095[published Online First: Epub Date]].
22. Charreire H, Feuillet T, Roda C, et al. Self-defined residential neighbourhoods: size variations and correlates across five European urban regions. *Obesity Reviews* 2016;**17**(S1):9-18
23. Guest AM, Lee BA. How urbanites define their neighborhoods. *Population and Environment* 1984;**7**(1):32-56
24. Pebley AR, Sastry N. Our place: perceived neighborhood size and names in Los Angeles. Los Angeles: California Center for Population Research, University of California 2009
25. Célio FdA, Xavier CC, Andrade ACdS, et al. Características individuais associadas à autopercepção da extensão territorial da vizinhança. *Cadernos de Saúde Pública* 2014;**30**:1935-46
26. Cutchin MP, Eschbach K, Mair CA, et al. The socio-spatial neighborhood estimation method: an approach to operationalizing the neighborhood concept. *Health & place* 2011;**17**(5):1113-21
27. Fotheringham AS, Wong DW. The modifiable areal unit problem in multivariate statistical analysis. *Environment and planning A* 1991;**23**(7):1025-44
28. Duncan DT, Kawachi I, Subramanian SV, et al. Examination of How Neighborhood Definition Influences Measurements of Youths' Access to Tobacco Retailers: A Methodological Note on Spatial Misclassification. *American Journal of Epidemiology* 2013 doi: 10.1093/aje/kwt251[published Online First: Epub Date]].
29. Sampson RJ, Morenoff JD, Gannon-Rowley T. Assessing" neighborhood effects": Social processes and new directions in research. *Annual review of sociology* 2002:443-78
30. Hillier B. Spatial sustainability in cities: organic patterns and sustainable forms. 2009
31. Andrade RGd, Chaves OC, Costa DAdS, et al. Overweight in men and women among urban area residents: individual factors and socioeconomic context. *Cadernos de Saúde Pública* 2015;**31**:148-58
32. Camargos VP, César CC, Caiaffa WT, et al. Imputação múltipla e análise de casos completos em modelos de regressão logística: uma avaliação prática do impacto das perdas em covariáveis. *Cad Saúde Pública* 2011;**27**:2299-313
33. Ferreira AD, César CC, Malta DC, et al. Validade de estimativas obtidas por inquérito telefônico: comparação entre VIGITEL 2008 e Inquérito Saúde em Beagá. *Rev Bras Epidemiol* 2011;**14**(1):16-30
34. Gerência de Epidemiologia e Informação Secretaria Municipal de Saúde de Belo Horizonte. Índice de vulnerabilidade à saúde. Secondary Índice de vulnerabilidade à saúde 2003. <http://www.pbh.gov.br/smsa/biblioteca/gabinete/risco2003>.
35. Friche AA, Xavier CC, Proietti FA, et al. *Saúde urbana em Belo Horizote*. 1 ed, 2015.
36. Friche AA, Diez-Roux AV, Cesar CC, et al. Assessing the Psychometric and Ecometric Properties of Neighborhood Scales in. *Journal of urban health : bulletin of the New York Academy of Medicine* 2012 doi: 10.1007/s11524-012-9737-z[published Online First: Epub Date]].
37. Dephmap [program]. 4.06 version. University of London, 2004.
38. Song Y, Knaap G-J. Measuring urban form: Is Portland winning the war on sprawl? *Journal of the American Planning Association* 2004;**70**(2):210-25
39. Demográfico IC. Resultados do universo. Rio de Janeiro: IBGE 2010
40. Barros AJ, Victora CG. Indicador econômico para o Brasil baseado no censo demográfico de 2000. *Revista de Saúde Pública* 2005;**39**(4):523-29
41. Merlo J, Chaix B, Ohlsson H, et al. A brief conceptual tutorial of multilevel analysis in social epidemiology: using measures of clustering in multilevel logistic regression to investigate contextual phenomena. *J Epidemiol Community Health* 2006;**60**(4):290-7 doi: 10.1136/jech.2004.029454[published Online First: Epub Date]].
42. Twisk J. Applied multilevel analysis: a practical guide. 2006: Cambridge University Press, Cambridge, UK.
43. StataCorp L. Stata survey data reference manual, 1985.
44. Sastry N, Pebley AR, Zonta M. Neighborhood definitions and the spatial dimension of daily life in Los Angeles. California Center for Population Research 2002

- 1  
2  
3 45. Stewart T, Duncan S, Chaix B, et al. A novel assessment of adolescent mobility: a pilot study.  
4 International journal of behavioral nutrition and physical activity 2015;**12**(1):18  
5 46. Hasanzadeh K, Broberg A, Kyttä M. Where is my neighborhood? A dynamic individual-based  
6 definition of home ranges and implementation of multiple evaluation criteria. Applied  
7 Geography 2017;**84**:1-10  
8 47. Vallée J, Le Roux G, Chaix B, et al. The 'constant size neighbourhood trap' in accessibility and  
9 health studies. Urban Studies 2014:0042098014528393  
10  
11  
12  
13  
14  
15  
16  
17  
18  
19  
20  
21  
22  
23  
24  
25  
26  
27  
28  
29  
30  
31  
32  
33  
34  
35  
36  
37  
38  
39  
40  
41  
42  
43  
44  
45  
46  
47  
48  
49  
50  
51  
52  
53  
54  
55  
56  
57  
58  
59  
60



**Table 1.** Univariate analysis of individual variables by perceived neighbourhood scale: percentages, means and standard deviations.

| INDIVIDUAL VARIABLES                                                          | Perceived neighbourhood scale (1-4 and %)* |              |              |              | OR (CI 95%) <sup>1</sup> | p      |
|-------------------------------------------------------------------------------|--------------------------------------------|--------------|--------------|--------------|--------------------------|--------|
|                                                                               | 1<br>(57.8%)                               | 2<br>(23.3%) | 3<br>(7.4%)  | 4<br>(11.5%) |                          |        |
| Gender (female)                                                               | 56.4                                       | 51.0         | 45.9         | 45.9         | 0.70 (0.58 – 0.83)       | <0.001 |
| Employment state (working)                                                    | 62.0                                       | 65.6         | 69           | 73.3         | 1.36 (1.14 - 1.61)       | <0.001 |
| Presence of child younger than 10 years (yes)                                 | 33.1                                       | 31.5         | 30.6         | 33.0         | 0.95 (0.82 - 1.11)       | 0.540  |
| Number of relatives and friends living in the same neighbourhood (almost all) | 2.92                                       | 7.07         | 7.83         | 13.03        | 6.30 (4.00 - 9.92)       | <0.001 |
| Recognizes most of them people passing by the door of his/her house (yes)     | 8.0                                        | 12.6         | 13.1         | 21.3         | 5.55 (3.04 - 10.11)      | <0.001 |
|                                                                               | Mean (standard deviation)                  |              |              |              | OR (CI 95%) <sup>1</sup> | p      |
| Age (years)                                                                   | 44.7 (0.35)                                | 44.9 (0.57)  | 41.1 (0.92)  | 43.2 (0.74)  | 0.99 (0.99 - 1.00)       | 0.060  |
| Socioeconomic position (NEI) **                                               | 586.8 (4.06)                               | 601.6 (6.6)  | 582.8 (11.4) | 601.4 (0.0)  | 1.13 (1.04 - 1.23)       | <0.001 |
| Time of residence in the same neighbourhood (years)                           | 14.8 (0.26)                                | 16.8 (0.44)  | 16.2 (0.71)  | 16.6 (0.60)  | 1.01 (1.01 - 1.02)       | <0.001 |

\* (1) up to the block or street you live on; (2) within 5 blocks; (3) within ten blocks; and (4) more than ten blocks away; OR – odds ratio; CI 95% – 95% confidence interval; NEI - national economic index; \*\* Odds ratio calculated based on an increase of 200 NEI points; <sup>1</sup> estimated by a multilevel ordinal logistic regression model, with reference category being the smaller neighbourhood.

**Table 2.** Univariate analysis of contextual variables by perceived neighbourhood scale: percentages, means and standard deviations

| CONTEXTUAL VARIABLES                      | NEIGHBORHOOD EXTENSION SCALE (1-4 and %)* |                      |                      |                      | OR (CI 95%) <sup>1</sup> | p      |
|-------------------------------------------|-------------------------------------------|----------------------|----------------------|----------------------|--------------------------|--------|
|                                           | 1<br>(57.8%)                              | 2<br>(23.3%)         | 3<br>(7.4%)          | 4<br>(11.5%)         |                          |        |
| Connectivity <sup>2</sup>                 |                                           |                      |                      |                      |                          |        |
| 0 to 3                                    | 39.91                                     | 40.91                | 41.87                | 40.37                | 1.00                     |        |
| 4                                         | 23.92                                     | 23.42                | 36.11                | 25.28                | 1.04 (0.83 - 1.30)       | 0.760  |
| 5 to 9                                    | 37.17                                     | 35.63                | 22.02                | 34.34                | 0.85 (0.70 - 1.04)       | 0.120  |
|                                           | Mean (standard deviation)                 |                      |                      |                      | OR (CI 95%) <sup>1</sup> | p      |
| Aesthetic quality domain                  | 2.96 (0.03)                               | 3.07 (0.04)          | 3.06 (0.07)          | 3.09 (0.04)          | 1.23 (1.03 - 1.46)       | 0.020  |
| Walking environment domain                | 3.20 (0.01)                               | 3.24 (0.02)          | 3.27 (0.02)          | 3.28 (0.02)          | 3.37 (2.09 - 5.44)       | <0.001 |
| Violence scale domain                     | 1.90 (0.02)                               | 1.95 (0.03)          | 1.89 (0.05)          | 2.00 (0.04)          | 1.20 (1.03 - 1.40)       | 0.020  |
| Safety scale domain                       | 2.96 (0.03)                               | 2.93 (0.05)          | 2.89 (0.09)          | 2.86 (0.05)          | 0.92 (0.79 - 1.08)       | 0.190  |
| Population density (per square kilometre) | 12487.35<br>(791.26)                      | 11740.34<br>(704.83) | 12274.31<br>(740.63) | 12627.22<br>(865.05) | 1.00 (0.99 - 1.01)       | 0.650  |

\* (1) up to the block or street you live on; (2) within 5 blocks; (3) within ten blocks; and (4) more than ten blocks away; OR – odds ratio; CI 95% – 95% confidence interval. <sup>1</sup> estimated by a multilevel ordinal logistic regression model, with reference category being the smaller neighbourhood; <sup>2</sup> 0 indicates poorly connected streets and 9 indicates heavily connected streets.

**Table 3.** Multilevel ordinal logistic regression for the resident perceived neighbourhood scale

| Variables                                                                     | Null model |  | Contextual variables     |         | Contextual variables + individual variables |         |
|-------------------------------------------------------------------------------|------------|--|--------------------------|---------|---------------------------------------------|---------|
|                                                                               |            |  | OR (CI 95%) <sup>1</sup> | p       | OR (CI 95%) <sup>1</sup>                    | p       |
| Aesthetic quality domain                                                      |            |  | 1.21 (0.97 - 1.41)       | 0.060   | 1.13 (0.92 - 1.39)                          | 0.230   |
| Walking environment domain                                                    |            |  | 2.96 (1.71 - 5.13)       | <0.001  | 2.22 (1.29 - 3.82)                          | <0.001  |
| Violence domain                                                               |            |  | 1.35 (1.12 - 1.62)       | <0.001  | 1.23 (1.01 - 1.51)                          | 0.040   |
| Safety domain                                                                 |            |  | 0.97 (0.82 - 1.14)       | 0.710   | 0.99 (0.83 - 1.19)                          | 0.950   |
| Connectivity <sup>2</sup>                                                     |            |  |                          |         |                                             |         |
| 4                                                                             |            |  | 1.00 (0.80 - 1.26)       | 0.940   | 1.06 (0.85 - 1.34)                          | 0.570   |
| 5 to 9                                                                        |            |  | 0.82 (0.67 - 1.01)       | 0.060   | 0.89 (0.72 - 1.11)                          | 0.310   |
| <b>INDIVIDUAL</b>                                                             |            |  |                          |         |                                             |         |
| Age (years)                                                                   |            |  |                          |         | 1.00 (0.99 - 1.00)                          | 0.350   |
| Gender (female)                                                               |            |  |                          |         | 0.81 (0.68 - 0.96)                          | 0.020   |
| Number of relatives and friends living in the same neighbourhood (almost all) |            |  |                          |         | 4.63 (2.84 - 7.57)                          | <0.001  |
| Recognizes most of the people passing by his/her house (yes)                  |            |  |                          |         | 3.33 (1.72 - 6.25)                          | <0.001  |
| Employment state (working)                                                    |            |  |                          |         | 1.26 (1.06 - 1.50)                          | 0.010   |
| Time of residence in the same neighbourhood (years)                           |            |  |                          |         | 1.01 (1.00 - 1.01)                          | 0.130   |
| Presence of child younger than 10 years old (yes)                             |            |  |                          |         | 0.97 (0.81 - 1.16)                          | 0.740   |
| Socioeconomic position**                                                      |            |  |                          |         | 1.17 (1.06 - 1.29)                          | <0.001  |
| <b>MODEL INFORMATION</b>                                                      |            |  |                          |         |                                             |         |
| Variance                                                                      | 0.2567     |  |                          | 0.2292  |                                             | 0.2336  |
| MOR                                                                           | 1.62       |  |                          | 1.58    |                                             | 1.58    |
| Proportional change in variance                                               | -          |  |                          | 10.71   |                                             | 9.00    |
| AIC                                                                           | 8749.26    |  |                          | 8668.44 |                                             | 8091.83 |

OR - odds ratio; CI 95% - 95% confidence interval; NEI - national economic index; MOR - median values of the odds ratio; AIC - Akaike information criterion; \*\* Odds ratio calculated based on an increase of 200 NEI points; <sup>1</sup> estimated by a multilevel ordinal logistic regression model, with the reference category being the smaller neighbourhood; <sup>2</sup> 0 indicates less connected streets and 9 indicates heavily connected streets.

1  
2  
3  
4  
5  
6 **Figure Legend:**  
7

8 Figure 1- Theoretical model for factors associated with perceived neighbourhood scale  
9  
10  
11  
12  
13  
14  
15  
16  
17  
18  
19  
20  
21  
22  
23  
24  
25  
26  
27  
28  
29  
30  
31  
32  
33  
34  
35  
36  
37  
38  
39  
40  
41  
42  
43  
44  
45  
46  
47

For peer review only

1  
2  
3  
4  
5  
6  
7  
8  
9  
10  
11  
12  
13  
14  
15  
16  
17  
18  
19  
20  
21  
22  
23  
24  
25  
26  
27  
28  
29  
30  
31  
32  
33  
34  
35  
36  
37  
38  
39  
40  
41  
42  
43  
44  
45  
46  
47  
48  
49  
50  
51  
52  
53  
54  
55  
56  
57  
58  
59  
60



Theoretical Model for perceived neighborhood scale

30x19mm (600 x 600 DPI)

STROBE Statement—Checklist of items that should be included in reports of *cross-sectional studies*

|                              | Item No | Recommendation                                                                                                                                                                                    |                   |
|------------------------------|---------|---------------------------------------------------------------------------------------------------------------------------------------------------------------------------------------------------|-------------------|
| <b>Title and abstract</b>    | 1       | (a) Indicate the study's design with a commonly used term in the title or the abstract                                                                                                            | x                 |
|                              |         | (b) Provide in the abstract an informative and balanced summary of what was done and what was found                                                                                               | x                 |
| <b>Introduction</b>          |         |                                                                                                                                                                                                   |                   |
| Background/rationale         | 2       | Explain the scientific background and rationale for the investigation being reported                                                                                                              | x (pages 3 and 4) |
| Objectives                   | 3       | State specific objectives, including any prespecified hypotheses                                                                                                                                  | x (page 5)        |
| <b>Methods</b>               |         |                                                                                                                                                                                                   |                   |
| Study design                 | 4       | Present key elements of study design early in the paper                                                                                                                                           | x (page 5)        |
| Setting                      | 5       | Describe the setting, locations, and relevant dates, including periods of recruitment, exposure, follow-up, and data collection                                                                   | x (page 5)        |
| Participants                 | 6       | (a) Give the eligibility criteria, and the sources and methods of selection of participants                                                                                                       | x (page 5)        |
| Variables                    | 7       | Clearly define all outcomes, exposures, predictors, potential confounders, and effect modifiers. Give diagnostic criteria, if applicable                                                          | x (pages 5 to 7)  |
| Data sources/<br>measurement | 8*      | For each variable of interest, give sources of data and details of methods of assessment (measurement). Describe comparability of assessment methods if there is more than one group              | Not applicable.   |
| Bias                         | 9       | Describe any efforts to address potential sources of bias                                                                                                                                         | Not applicable.   |
| Study size                   | 10      | Explain how the study size was arrived at                                                                                                                                                         | x (page 5)        |
| Quantitative variables       | 11      | Explain how quantitative variables were handled in the analyses. If applicable, describe which groupings were chosen and why                                                                      |                   |
| Statistical methods          | 12      | (a) Describe all statistical methods, including those used to control for confounding                                                                                                             | x (pages 7 and 8) |
|                              |         | (b) Describe any methods used to examine subgroups and interactions                                                                                                                               | Not applicable.   |
|                              |         | (c) Explain how missing data were addressed                                                                                                                                                       | Not applicable.   |
|                              |         | (d) If applicable, describe analytical methods taking account of sampling strategy                                                                                                                | x (page 8)        |
|                              |         | (e) Describe any sensitivity analyses                                                                                                                                                             | Not applicable.   |
| <b>Results</b>               |         |                                                                                                                                                                                                   |                   |
| Participants                 | 13*     | (a) Report numbers of individuals at each stage of study—eg numbers potentially eligible, examined for eligibility, confirmed eligible, included in the study, completing follow-up, and analysed | x (page 8)        |
|                              |         | (b) Give reasons for non-participation at each stage                                                                                                                                              | Not applicable.   |
|                              |         | (c) Consider use of a flow diagram                                                                                                                                                                | Not applicable.   |
| Descriptive data             | 14*     | (a) Give characteristics of study participants (eg                                                                                                                                                | x (page 8)        |

|                          |     |                                                                                                                                                                                                              |                   |
|--------------------------|-----|--------------------------------------------------------------------------------------------------------------------------------------------------------------------------------------------------------------|-------------------|
|                          |     | demographic, clinical, social) and information on exposures and potential confounders                                                                                                                        |                   |
|                          |     | (b) Indicate number of participants with missing data for each variable of interest                                                                                                                          | Not applicable.   |
| Outcome data             | 15* | Report numbers of outcome events or summary measures                                                                                                                                                         | x (pages 8 and 9) |
| Main results             | 16  | (a) Give unadjusted estimates and, if applicable, confounder-adjusted estimates and their precision (eg, 95% confidence interval). Make clear which confounders were adjusted for and why they were included | x                 |
|                          |     | (b) Report category boundaries when continuous variables were categorized                                                                                                                                    | x                 |
|                          |     | (c) If relevant, consider translating estimates of relative risk into absolute risk for a meaningful time period                                                                                             | Not applicable.   |
| Other analyses           | 17  | Report other analyses done—eg analyses of subgroups and interactions, and sensitivity analyses                                                                                                               | Not applicable.   |
| <b>Discussion</b>        |     |                                                                                                                                                                                                              |                   |
| Key results              | 18  | Summarise key results with reference to study objectives                                                                                                                                                     | x (page 9)        |
| Limitations              | 19  | Discuss limitations of the study, taking into account sources of potential bias or imprecision. Discuss both direction and magnitude of any potential bias                                                   | x (page 11)       |
| Interpretation           | 20  | Give a cautious overall interpretation of results considering objectives, limitations, multiplicity of analyses, results from similar studies, and other relevant evidence                                   | x (page 11)       |
| Generalisability         | 21  | Discuss the generalisability (external validity) of the study results                                                                                                                                        | x (page 11)       |
| <b>Other information</b> |     |                                                                                                                                                                                                              |                   |
| Funding                  | 22  | Give the source of funding and the role of the funders for the present study and, if applicable, for the original study on which the present article is based                                                | x (page 13)       |

\*Give information separately for exposed and unexposed groups.

**Note:** An Explanation and Elaboration article discusses each checklist item and gives methodological background and published examples of transparent reporting. The STROBE checklist is best used in conjunction with this article (freely available on the Web sites of PLoS Medicine at <http://www.plosmedicine.org/>, Annals of Internal Medicine at <http://www.annals.org/>, and Epidemiology at <http://www.epidem.com/>). Information on the STROBE Initiative is available at [www.strobe-statement.org](http://www.strobe-statement.org).
